1  
2  
3  
4  
5  
6  
7  
8  
9  
10  
11  
12  
13  
14  
15  
16  
17  
18  
19  
20  
21  
22

## **Exploring the association between housing insecurity and mental health among renters: A systematic review**

Mira Talmatzky<sup>1\*</sup>, Laura Nohr<sup>1</sup>, Christine Knaevelsrud<sup>1</sup>, Helen Niemeyer<sup>1</sup>

<sup>1</sup> Division of Clinical Psychological Intervention, Department of Education and Psychology, Freie Universität Berlin, Berlin, Germany

\*Corresponding Author:  
Email: [mira.talmatzky@fu-berlin.de](mailto:mira.talmatzky@fu-berlin.de) (MT)

23

## Abstract

24 Adverse social and economic conditions negatively impact mental health and well-being.  
25 The present systematic review is the first to investigate the association between housing  
26 insecurity and mental health outcomes among renters, with a focus on housing affordability  
27 and instability. We followed the Preferred Reporting Items for Systematic reviews and  
28 Meta-Analyses (PRISMA) guidelines. A comprehensive search was conducted in December  
29 2022 across four databases (MEDLINE, PsycINFO, Web of Science, and ASSIA).  
30 Quantitative studies from OECD (Organisation for Economic Co-operation and  
31 Development) member countries were eligible for inclusion if they investigated housing  
32 insecurity by examining at least one independent variable related to housing affordability  
33 and/or instability, and included at least one mental health-related outcome among adult  
34 renters. Due to heterogeneity of the identified studies, we performed a narrative synthesis.  
35 Twenty-two studies met the inclusion criteria, of which 14 applied a longitudinal design, five  
36 a cross-sectional design, and three a quasi-experimental design. Among the nine studies  
37 examining housing affordability, six reported significant associations between unaffordable  
38 rent and poor mental health in low-income renters. Regarding housing instability, 12 out of  
39 14 studies reported significant associations between unstable housing and renters' mental  
40 health issues. Measures of housing insecurity varied, with rent-to-income ratio and forced  
41 moves being most commonly employed. Mental health outcomes focused primarily on  
42 overall mental health, well-being, and depressive symptoms, while few studies explored  
43 other mental health outcomes. The findings suggest that experiencing unaffordable or  
44 unstable housing has a negative impact on renters' overall mental health and depressive  
45 symptoms. Housing insecurity poses a significant challenge for renters in OECD countries,  
46 highlighting the need for policymakers to implement supportive housing policies and tenure  
47 protection measures in order to improve renters' housing security and ultimately public  
48 health.

49

## Introduction

### 50 Background

51 Social conditions and contextual factors significantly influence the risk, development,  
52 and persistence of mental disorders and psychological distress. According to the World  
53 Health Organization (WHO), social determinants, encompassing the conditions in which  
54 individuals are born, grow, work, live, and age, contribute to severe health inequalities within  
55 contemporary societies (WHO & Calouste Gulbenkian Foundation, 2014). Housing is widely  
56 recognized as a significant social determinant influencing mental health and contributing to  
57 public health challenges (Baumgartner et al., 2023; Compton & Shim, 2015; Lund et al.,  
58 2018; Marmot & Wilkinson, 2005; Shaw, 2004; Suglia et al., 2015; Swope & Hernández,  
59 2019). Housing insecurity is a global phenomenon, which exposes individuals to various  
60 forms of challenges, including unaffordable housing, poor housing conditions, a lack of  
61 stable tenure, and homelessness (DeLuca & Rosen, 2022; Eurostat, 2022; Prindex, 2020;  
62 United Nations, 2020). Renters, and particularly low-income renters, are especially  
63 vulnerable to these housing disadvantages (DeLuca & Rosen, 2022; Hulse et al., 2019;  
64 Routhier, 2019). Indeed, insecure housing not only compromises the basic need for shelter  
65 but also poses significant risks to mental health.

66 Multiple systematic reviews have explored the association between housing  
67 insecurity and mental health outcomes, providing valuable insights within this field of  
68 research. Nevertheless, all of these reviews either did not differentiate by tenure status or  
69 focused specifically on tenures other than renting, such as home ownership or  
70 homelessness. For instance, research has investigated a range of housing disadvantages,  
71 such as eviction and foreclosure (A. C. Tsai, 2015; H. Vásquez-Vera et al., 2017), financial  
72 distress of homeowners (Downing, 2016), and homelessness (Fazel et al., 2008; Hodgson et  
73 al., 2013), and their link to mental health. In a systematic review of longitudinal studies,  
74 Singh et al. (2019) found that prior exposure to housing disadvantages can have effects on  
75 mental health later in life. Moreover, the impact of living environment and neighborhood

76 conditions, such as poor housing quality and air pollution, on psychological distress has  
77 been extensively studied in multiple systematic reviews (Rautio et al., 2018; Richardson et  
78 al., 2015; Truong & Ma, 2006). Additionally, systematic reviews have explored the  
79 relationship between housing and mental health in specific populations, such as students  
80 (Franzoi et al., 2022), children (Jelleyman & Spencer, 2008; Y. Li et al., 2021), and  
81 individuals with severe mental illnesses (Kyle & Dunn, 2008). However, to the best of our  
82 knowledge, no review to date has specifically examined the issue of housing insecurity  
83 among renters and its impact on mental health.

#### 84 **Linking Housing Insecurity to Renters' Mental Health**

85 Housing scholars have long emphasized that housing is more than a mere physical  
86 shelter. Rather, it constitutes a social and emotional environment that significantly impacts  
87 our psychological well-being (Easthope, 2014; Hiscock et al., 2001; Hulse & Saugeres,  
88 2008; Padgett, 2007). The acute and chronic stress resulting from exposure to social  
89 disadvantages directly and indirectly impact the development and course of mental disorders  
90 (Marmot & Wilkinson, 2005). In a systematic review of social determinants influencing  
91 mental disorders, Lund et al. (2018) identified depression, anxiety, substance abuse, suicide,  
92 psychosis, and dementia as potential outcomes associated with economic disadvantages,  
93 including housing issues. Traditionally, the literature has emphasized the (health) benefits of  
94 homeownership, while considering rental tenure as inherently negative for mental well-being  
95 due to its lack of stability and ontological security (Dupuis & Thorns, 1998; Kearns et al.,  
96 2000). Recently, however, a growing body of research has explicitly examined the  
97 composition of cohorts living in rental housing as well as the specific rental conditions that  
98 impact mental health (Acolin, 2022; Baker et al., 2013; Herbers & Mulder, 2017; Hulse &  
99 Milligan, 2014). A factor driving this shift was the sudden rise in the number of renters,  
100 particularly within the private rental sector, in high-income countries traditionally dominated  
101 by homeownership, such as Australia (Hulse & Yates, 2017), the United Kingdom (UK;  
102 Bone, 2014), and the United States of America (U.S.; Crook & Kemp, 2014). Worldwide,

103 renters face various pressures, including constrained housing markets, rising rental costs,  
104 and the associated challenges of finding affordable, stable, and suitable housing  
105 (Baumgartner et al., 2023; Bone, 2014; Clair et al., 2019; Eurostat, 2022; Routhier, 2019).  
106 These challenges have been further reinforced by recent societal upheavals such as the  
107 COVID-19 pandemic, related social and economic lockdowns, and the energy crisis (Baker,  
108 Bentley, et al., 2020; Oswald et al., 2022; Waldron, 2022). Governments have implemented  
109 a range of housing policies and programs to address the issue of housing security, including  
110 social/public housing, housing subsidies, or eviction policies (DeLuca & Rosen, 2022; Dweik  
111 & Woodhall-Melnik, 2022). However, according to DeLuca and Rosen (2022), these housing  
112 programs frequently fail to reach those who truly need them, and many eligible renters do  
113 not receive the necessary support. In brief, renters have emerged as a vulnerable group that  
114 is disproportionately affected by housing insecurity and economic crises. Against this  
115 background, the present systematic review aims to explore the association between housing  
116 insecurity and mental health outcomes among renters.

### 117 **Conceptualization of Housing Insecurity Among Renters**

118 Housing insecurity is a multidimensional concept. Although definitions vary across  
119 scholars, commonly applied dimensions include housing affordability, quality, (in-)stability,  
120 safety, and neighborhood opportunities (Clair et al., 2019; Cox et al., 2019; DeLuca &  
121 Rosen, 2022; Swope & Hernández, 2019). Hence, exposure to housing insecurity refers to  
122 conditions and situations in which individuals face challenges related to these dimensions.  
123 Housing insecurity intersects with insecurities in other domains, such as finance,  
124 employment, family, and health, often creating a complex interplay in which these  
125 insecurities interact and mutually reinforce each other (Hulse & Saugeres, 2008). With  
126 regard to renters, secure housing involves finding and maintaining homes that meet tenants'  
127 needs, and is influenced by factors beyond legal tenure, including societal context (e.g., rent  
128 regulations), the market (e.g., affordability), public policy (e.g., rental assistance), cultural  
129 norms, and psychosocial dimensions of security (Hulse & Milligan, 2014; Hulse et al., 2011;

130 James et al., 2022). In this systematic review, we focus on two primary dimensions of  
131 housing insecurity among renters:

132 *Housing unaffordability* stands out as the most extensively studied issue among renters and  
133 is the strongest standalone dimension of housing insecurity (Clair et al., 2019; Hulse &  
134 Milligan, 2014; Routhier, 2019). Affordability refers to the ability of renters to meet the costs  
135 of housing, including rent and other related expenses such as utilities and deposits, without  
136 experiencing excessive financial strain (Clair et al., 2019; Cox et al., 2019; Routhier, 2019;  
137 Swope & Hernández, 2019). The operationalization of housing affordability varies across  
138 studies (Cox et al., 2019), with common approaches being the rent-to-income ratio (e.g.,  
139 “housing-cost burden”), housing-induced poverty, residual income, and subjective measures  
140 of difficulty to afford the rent (Routhier, 2019). In the case of rent-to-income ratio, the  
141 threshold for when a household is considered unaffordable varies between 30 and 50 %  
142 (Cox et al., 2019), sometimes with the added criterion that the household income is in the  
143 bottom 40 % of the national distribution, referred to as the ‘30/40’ measure (Nepal et al.,  
144 2010).

145 *Housing instability* poses another primary barrier to secure housing for renters (Clair et al.,  
146 2019; Cox et al., 2019; Routhier, 2019; Swope & Hernández, 2019). Stability refers to the  
147 ability of renters to remain in their housing for as long as they wish (Clair et al., 2019; Cox et  
148 al., 2019; Routhier, 2019; Swope & Hernández, 2019). Common measurement approaches  
149 for housing instability among renters include eviction and frequency of moving (Routhier,  
150 2019). However, compared to affordability, operationalizations of instability vary more  
151 broadly across different studies, and also include issues such as overcrowding, doubling up,  
152 duration of stay, and rental arrears (Cox et al., 2019; Swope & Hernández, 2019).

### 153 **Objectives**

154 The present study aimed to explore exposure to housing insecurity, i.e.  
155 unaffordability and instability, and its impact on mental health among renters. For this  
156 purpose, we focused on adults living in OECD (Organisation for Economic Co-operation and

157 Development, 2023) member countries to ensure greater comparability within  
158 socioeconomic contexts. All types of rental tenure (e.g., private or social renting) were  
159 included. Studies with renter samples in housing programs and subsidies directed at  
160 improving housing affordability and/or instability were also eligible for inclusion. Using a  
161 systematic review methodology and narrative synthesis, the primary objectives of this  
162 research were to comprehensively identify relevant study reports, synthesize key findings,  
163 and propose potential areas for future investigations. We further evaluated the reporting  
164 quality of the included studies, as transparent reporting is crucial for assessing the quality of  
165 studies and their replicability (Purssell & McCrae, 2020).

## 166 **Methods**

167 The review was conducted and reported according to the Preferred Reporting Items  
168 for Systematic Reviews and Meta-Analyses (Page et al., 2021) guidelines (PRISMA  
169 checklist provided in S1 Appendix). To synthesize the evidence, a narrative synthesis was  
170 chosen over a meta-analysis, due to the heterogeneity of the included studies regarding  
171 methodology and the applied definitions of housing insecurity. The review was not pre-  
172 registered.

### 173 **Eligibility Criteria**

174 To be eligible for inclusion, studies needed to be quantitative primary or secondary  
175 research published in English that investigated housing insecurity by examining at least one  
176 variable related to housing affordability, such as housing cost burden or receiving rental  
177 assistance, and/or housing instability, such as frequent moves, forced moves, or  
178 overcrowding. Studies investigating housing programs or policies aimed at improving  
179 affordability and/or stability, such as rental assistance or eviction prevention programs, were  
180 also considered for inclusion. Furthermore, studies needed to include at least one mental  
181 health-related outcome, such as specific mental disorders, overall mental well-being, suicidal  
182 behavior, or treatment for mental health reasons (e.g., medication for emotional conditions).

183 Only data points that focused on the population of adults living in rental households were  
184 eligible for inclusion, with no restriction on the type of rental tenure (e.g., private or social  
185 renting). Longitudinal studies measuring tenure status at only one time point were eligible for  
186 inclusion if they considered their population as “renters”. Studies needed to be situated in  
187 OECD countries. No restrictions were made regarding publication date or status.

188 Data points were excluded if they analyzed other forms of housing insecurity such as  
189 housing quality, safety, neighborhood characteristics, and homelessness. Likewise, data  
190 points examining residential satisfaction and general health outcomes were excluded.  
191 Populations other than renters, such as homeowners or homeless individuals, were not  
192 eligible. While studies examining children and adolescents were also not eligible, studies  
193 that examined adult populations while including individuals who were at least 15 years old  
194 were included in the analysis. Editorials, reviews, qualitative studies, and research with  
195 solely descriptive data were excluded.

## 196 **Search Strategy**

197 A comprehensive search of the literature was conducted in two stages. In the first stage,  
198 four electronic databases were searched: MEDLINE (PubMed), PsycINFO (EBSCO), Web of  
199 Science Core Collections, and ASSIA (ProQuest). These databases were selected because  
200 they cover a broad range of disciplines that are relevant to housing and mental health  
201 research, such as psychology, social sciences, and public health, and also feature a wide  
202 range of document types, including dissertations and conference proceedings. The search  
203 was based on three search components:

- 204 (a) the target population of renters,
- 205 (b) exposure to housing insecurity (housing affordability and/or instability), and
- 206 (c) mental health-related outcomes.

207 To identify relevant keywords, synonyms were searched for and key studies in the field  
208 were consulted. Additionally, Medical Subject Heading (MeSH) terms were used for  
209 MEDLINE and thesaurus index terms were used for PsycINFO and ASSIA. To further



210 enhance the sensitivity of the search strategy, wildcard symbols were utilized and no search  
211 filters or limits were applied. The literature search was conducted on December 9, 2022. The  
212 detailed search syntax is provided in S2 Appendix.

213 In the second stage, citation tracking was used to further increase sensitivity and reduce  
214 potential bias due to unpublished studies or studies not indexed in the selected databases.  
215 Backward citation tracking involved screening titles and abstracts of the reference lists from  
216 included studies and related systematic review. Forward citation tracking was conducted  
217 from February 23 to 27, 2023, screening the titles and abstracts of all studies that cited the  
218 included studies.

### 219 **Study Selection**

220 After exporting all search results into the reference management program Citavi  
221 (Version 6.14), duplicate records were removed. The initial screening process involved  
222 assessing the title and abstract of each record for eligibility. If a record was considered  
223 eligible or potentially eligible, its full text was retrieved and screened accordingly. Study  
224 selection was conducted hierarchically using a screening form, based on the research  
225 question and predefined inclusion and exclusion criteria. Exclusion reasons for full-text  
226 reports were documented and are provided in S3 Appendix. It was ensured that studies  
227 which used the same database were distinct, as they examined separate research questions  
228 with different mental health-related outcomes and/or variables assessing housing  
229 affordability and/or instability. The screening process was conducted by the first author,  
230 without the use of automation tools. In cases of uncertainty, discussions with the co-author  
231 H.N. were held to reach a decision. Additionally, to ensure reliability, a randomized subset of  
232 10 % of the full texts ( $N = 12$ ) was independently screened by the co-author L.N. and the  
233 interrater reliability was calculated using Cohen's kappa (Cohen, 1960).

### 234 **Data Extraction and Synthesis Method**

235 The study characteristics of the included studies were extracted by the first author  
236 and recorded in an extraction sheet, which comprises (a) the study characteristics (e.g.,

237 author and year, country, study design, information about the study population), (b) variables  
238 (exposure and outcome variables, as well as measurements), (c) statistical methods and  
239 study limitations and strengths, and (d) main findings. The main results were extracted  
240 separately for each variable assessing housing affordability and/or instability and mental  
241 health-related outcome measure. In the summary table, adjusted results including statistical  
242 significance, relevant effect measures (mostly odds ratios or mean differences) and  
243 confidence intervals were reported whenever possible. Unadjusted results were reported  
244 only when adjusted results were not available. After the initial extraction, a verification  
245 process was conducted by the co-author L.N. in a randomized subset of 30 % of the  
246 included studies ( $N = 7$ ) by checking whether the extracted information of the included  
247 studies was accurate. Discrepancies were resolved through discussions between the  
248 authors and the extracted information was clarified and corrected as needed.

249 In the evidence synthesis, the main findings of the included studies were grouped  
250 and presented by outcome and predictor variables. In an initial step, predictor variables were  
251 classified into the two dimensions housing affordability and instability. If studies examined  
252 housing programs and policies like housing benefits, social housing, or eviction moratorium,  
253 categorization was determined by their principal objectives. If studies employed different  
254 samples or multiple predictor variables belonging to different categories of housing  
255 insecurity, each of them was reported separately. Outcome measures were grouped into the  
256 categories “overall mental health, well-being, and psychological distress”, “psychosocial  
257 functioning”, “symptoms of mental disorders”, and “mental health treatment”.

### 258 **Assessment of Reporting Quality**

259 The reporting quality of cohort and cross-sectional studies was assessed using the  
260 well-established STROBE (STrengthening the Reporting of OBservational studies in  
261 Epidemiology) statement for cross-sectional and cohort studies (Elm et al., 2008).  
262 Quasi-experimental studies were assessed using the TREND (Transparent Reporting of

263 Evaluations with Nonrandomized Designs) statement (Des Jarlais et al., 2004). The  
264 assessment was carried out by the first author.

## 265 **Evidence Synthesis**

### 266 **Study Selection**

267 The study selection process is illustrated in the PRISMA flow diagram (Fig 1). The  
268 initial search yielded a total of 1,198 potentially eligible titles (after removal of duplicates).  
269 Following title and abstract screening, 74 full-text studies were assessed for eligibility  
270 (despite multiple attempts to contact the authors, two reports could not be retrieved). Of  
271 these, 19 studies met the inclusion criteria. Based on the initial results, a subsequent step  
272 involved identifying 49 additional reports through backward and forward citation tracking.  
273 This process resulted in the inclusion of three studies. A detailed overview of the reasons for  
274 exclusion is provided in S3 Appendix. The most common reason for exclusion was that  
275 studies did not specifically analyze the association of housing insecurity and mental health  
276 among renters but rather addressed housing insecurity more broadly (e.g., statistical  
277 analyses were not separated by tenant subgroups). Overall, a total of 22 studies were  
278 included in the evidence synthesis. The interrater reliability of the study selection process  
279 was  $\kappa = 1$ , indicating almost perfect agreement (Cohen, 1960; Landis & Koch, 1977).

280 **Fig 1. PRISMA 2020 flow diagram.**

### 281 **Study Characteristics**

282 Characteristics of the included studies are displayed in Table 1 (housing affordability)  
283 and Table 2 (housing instability). Eleven of the studies were from the U.S., six from  
284 Australia, three from the UK, and one each from the Netherlands, South Korea, and Spain.  
285 Fourteen studies were longitudinal studies, five were cross-sectional studies, and three were  
286 quasi-experimental studies without actively manipulated interventions. The majority of the  
287 studies were secondary analyses. With the exception of one study, all were published within  
288 the last decade, mostly in 2020 or later.

289           The selected studies addressed a wide range of research questions, with only a few  
290 of them focusing exclusively on the population of interest. Eight out of 22 studies examined  
291 housing insecurity broadly, including not only renters but also other housing tenures such as  
292 homeowners, while analyzing renters separately in at least one analysis. Six studies  
293 identified their (sub-)samples as private renters (Baker, Lester, et al., 2020; Bentley et al.,  
294 2016; A. Li et al., 2022; Mason et al., 2013; Reeves et al., 2016; ViforJ et al., 2022) and two  
295 as public renters (Baker, Lester, et al., 2020; Prentice & Scutella, 2020). Moreover, a  
296 number of studies examined specific population groups, such as low-income renter  
297 households (for more details see Table 1 and Table 2. It is important to note that four studies  
298 with longitudinal data only measured tenure status at one time point; therefore, it is possible  
299 that changes in tenure status occurred over time (Pevalin, 2009; Prentice & Scutella, 2020;  
300 J. Tsai et al., 2021; ViforJ et al., 2022).

301 **Table 1**302 *Summary characteristics of the included studies regarding housing affordability and mental health (ordered alphabetically according to author's name)*

| Study                                 | Country         | Study Design               | Data Source & Years of Collection                                            | Main Objective of Study                                                                                                           | Study Population (Analytical Sample)                                                                                                                                                       | Predictor Operationalization & Measurement<br><i>Housing Insecurity</i>                                                                                                       | Outcome Operationalization & Measurement<br><i>Mental Health</i> | Main Findings                                                                                                                                                                                                                                                                                                                                                                                                                                    |
|---------------------------------------|-----------------|----------------------------|------------------------------------------------------------------------------|-----------------------------------------------------------------------------------------------------------------------------------|--------------------------------------------------------------------------------------------------------------------------------------------------------------------------------------------|-------------------------------------------------------------------------------------------------------------------------------------------------------------------------------|------------------------------------------------------------------|--------------------------------------------------------------------------------------------------------------------------------------------------------------------------------------------------------------------------------------------------------------------------------------------------------------------------------------------------------------------------------------------------------------------------------------------------|
| <b>Arundel et al. (2022)</b>          | The Netherlands | Longitudinal (Panel study) | Longitudinal Internet Studies for the Social Sciences (LISS Panel) 2008-2019 | Examining the link between housing unaffordability and mental health and how this is differentiated across age cohorts and tenure | Renters not living in parental home (complete case analysis)<br>Age 25-65 years<br>$N_{Renters} = N/A^a$                                                                                   | <i>Housing affordability stress (HAS)</i><br>'30/40' measure <sup>b</sup>                                                                                                     | <i>Mental health and well-being</i><br>MHI-5 from the SF-36      | Renters with HAS consistently showed lower mental health scores compared to renters without HAS, with significant differences observed at a 90 % CI, except for the years 2009 & 2012. The divergence in mental health between those with and without HAS was particularly pronounced among renters in the 35-44 age cohort.                                                                                                                     |
| <b>Baker et al. (2020)</b>            | Australia       | Longitudinal (Panel study) | Household, Income and Labour Dynamics in Australia (HILDA) 2002-2016         | Examining the mental health effects of (prolonged and intermittent) patterns of exposure to housing affordability problems        | Private renters & public renters who took part in the survey for five consecutive waves (complete case analysis)<br>Age $\geq 15$ years<br>$N_{Private} = 1,401^c$<br>$N_{Public} = 9,694$ | <i>Housing affordability stress pattern</i><br>Pattern of exposure to HAS over time: prolonged vs. intermittent affordability problems vs. unexposed to housing affordability | <i>Mental health and well-being</i><br>MCS from the SF-36        | Both the intermittent and the prolonged exposure group had lower mental health scores compared to renters unexposed to HAS, with the prolonged group showing the lowest average scores.<br><br>For private renters, the group mean differences between prolonged vs. unexposed and between prolonged vs. intermittent HAS were not significant. For public renters, the group mean differences were all significant ( $p < .01$ ) <sup>d</sup> . |
| <b>Bentley et al. (2016) [Part a]</b> | Australia       | Longitudinal (Panel study) | HILDA 2001-2008                                                              | Examining whether the mental health of people in different tenure types was differentially affected by unaffordable housing       | Low-income private renters<br>Age 25-64 years<br>$N_{Renters} = N/A^e$<br>(3,036 observations)                                                                                             | <i>Housing cost burden</i><br>Rent payments exceeded 30 % of gross household income (equivalent to '30/40' measure)                                                           | <i>Mental health and well-being</i><br>MCS from the SF-36        | Private renters whose housing became unaffordable experienced a small but significant decline in mental health (mean change = -0.45; 95 % CI: -0.81, -0.09; $p = .014$ ).                                                                                                                                                                                                                                                                        |

| Study                                  | Country   | Study Design                | Data Source & Years of Collection                                           | Main Objective of Study                                                                                                                                      | Study Population (Analytical Sample)                                                                                                               | Predictor Operationalization & Measurement<br><i>Housing Insecurity</i>                                                                | Outcome Operationalization & Measurement<br><i>Mental Health</i>                                                             | Main Findings                                                                                                                                                                                                                                                                             |
|----------------------------------------|-----------|-----------------------------|-----------------------------------------------------------------------------|--------------------------------------------------------------------------------------------------------------------------------------------------------------|----------------------------------------------------------------------------------------------------------------------------------------------------|----------------------------------------------------------------------------------------------------------------------------------------|------------------------------------------------------------------------------------------------------------------------------|-------------------------------------------------------------------------------------------------------------------------------------------------------------------------------------------------------------------------------------------------------------------------------------------|
| <b>Bentley et al. (2016) [Part b]</b>  | UK        | Longitudinal (Panel study)  | British Household Panel Survey (BHPS)<br>2001-2008                          | See [Part a]                                                                                                                                                 | Low-income private renters<br>Age 25-64 years<br>$N_{Renters} = N/A^{\dagger}$<br>(2,373 observations)                                             | <i>Housing cost burden</i><br>See [Part a]                                                                                             | <i>Mental health and well-being</i><br>GHQ-12                                                                                | Private renters whose housing became unaffordable experienced no significant change in mental health (mean change = 0.30; 95 % CI: -0.67, 1.26; $p = .749$ ).                                                                                                                             |
| <b>Chambers et al. (2015) [Part a]</b> | U.S.      | Cross-sectional             | Affordable Housing as an Obesity Mediating Environment (AHOME)<br>2011-2012 | Investigating whether the type of housing assistance and the conditions of the home and neighborhood are associated with mental health outcomes of residents | Low-income Latin American renters living in the Bronx, eligible for rental assistance (complete case analysis)<br>Age $\geq 18$ years<br>$N = 371$ | <i>Receiving housing assistance</i><br>Unassisted vs. public housing residents vs. Section 8 voucher                                   | <i>Symptoms of depression</i><br>CES-D 10<br><br><i>Hostile affect</i><br>Items of the Hostile Affect Subscale from the CMHS | Receipt of housing assistance was not significantly associated with depressive symptomology (OR = 0.857; 95 % CI: 0.48, 1.53; $p$ -value N/A) or hostility (OR = 1.738; 95 % CI: 0.8, 3.76; $p$ -value N/A).                                                                              |
| <b>Elliott et al. (2021)</b>           | U.S.      | Longitudinal (Cohort study) | Fragile Families & Child Well-being Study (FFCWS)<br>1998-2017              | Analyzing the relationship between housing cost burden and mental health outcomes reported by a sample of rent-burdened primary caregiver mothers            | Mothers/female caregivers from low-income rental households (complete case analysis)<br>Age N/A<br>$N = 399$                                       | <i>Housing cost burden</i><br>Monthly rent as a proportion of income (< 31 % not burdened, 31-49 % burdened, > 50 % severely burdened) | <i>Symptoms of depression</i><br>Items from the CIDI-SF                                                                      | Mothers/female caregivers from low-income rental households who experienced rent burden (OR = 1.7, $p = .004$ ) or severe rent burden (OR = 1.5, $p = .005$ ) were significantly more likely to report liberal criteria for depression than those who did not experience rent burden.     |
| <b>Mason et al. (2013)</b>             | Australia | Longitudinal (Panel study)  | HILDA<br>2001-2010                                                          | Investigating whether a relationship exists between unaffordable housing and mental health                                                                   | Low-income private renters who experienced a change in their affordability status during the study period                                          | <i>Housing affordability stress (HAS)</i><br>'30/40' measure                                                                           | <i>Mental health and well-being</i><br>MCS from the SF-36                                                                    | Among low-income private renters, individuals in unaffordable housing showed a mean MCS score that was 1.18 points lower than the mean score when their housing was affordable (95 % CI: 1.95, 0.41, $p = .003$ ). These results were consistent across different low- and mid-low-income |

| Study                                 | Country   | Study Design                                                 | Data Source & Years of Collection                                 | Main Objective of Study                                                                                                                                                             | Study Population (Analytical Sample)                                                                                            | Predictor Operationalization & Measurement                                                                                                            | Outcome Operationalization & Measurement                                                                                                  | Main Findings                                                                                                                                                                                                                                                                                                                                                              |
|---------------------------------------|-----------|--------------------------------------------------------------|-------------------------------------------------------------------|-------------------------------------------------------------------------------------------------------------------------------------------------------------------------------------|---------------------------------------------------------------------------------------------------------------------------------|-------------------------------------------------------------------------------------------------------------------------------------------------------|-------------------------------------------------------------------------------------------------------------------------------------------|----------------------------------------------------------------------------------------------------------------------------------------------------------------------------------------------------------------------------------------------------------------------------------------------------------------------------------------------------------------------------|
|                                       |           |                                                              |                                                                   | that differs between home purchasers and private renters among low-income households                                                                                                | Age 25-64 years<br>$N_{Renters} = N/A$<br>(4,362 observations) <sup>g</sup>                                                     |                                                                                                                                                       | <i>Housing Insecurity</i><br><br><i>Mental Health</i>                                                                                     | subgroups, but were not replicated in sensitivity analyses examining higher-income households.                                                                                                                                                                                                                                                                             |
| <b>Prentice &amp; Scutella (2020)</b> | Australia | Quasi-experimental study/longitudinal data                   | HILDA <sup>h</sup><br>2001-2015                                   | Estimating the impacts of social housing on employment, education, health, incarceration and homelessness                                                                           | Renters in social housing at time t (Control group: low-income renters)<br>Age ≥ 15 years<br>$N = N/A$                          | <i>Living in social housing</i><br>Renters in community or public housing vs. low-income renters not living in social housing (matched control group) | <i>Psychological distress</i><br>K6<br><br><i>Mental health and well-being</i><br>MHI-5 from the SF-36                                    | No significant improvements in mental health arising from social housing at t+1 (6-12 months later); indeed, social housing residents had significantly worse outcomes (ATT = 1 (MHI-5), ATT = 0.6 (K6), $p < .05$ ).                                                                                                                                                      |
| <b>Reeves et al. (2016)</b>           | UK        | Quasi-experimental study/repeated cross-sectional data       | Annual Population Survey (APS)<br>2009-2013                       | Evaluating the association between housing security and mental ill health by investigating the link between a reduction in income (reduction of housing benefits) and mental health | Private renters receiving Housing Benefits (HB) (Control group: Private renters without HB)<br>Age 16-69 years<br>$N = 179,037$ | <i>Amount of housing benefits</i><br>HB reduction in 2011 (mean reduction of approximately £1,220 per year)                                           | <i>Symptoms of depression</i><br>What health problems does the respondent currently have (list incl. "depression, bad nerves or anxiety") | The reduction of HB increased the risk of depressive symptoms among persons claiming the HB by approximately 1.8 percentage points (95 % CI: 1.0, 2.7; $p < .01$ ) above the risk in private renters not claiming the benefit. This effect remained after matching the groups. The increase in depressive symptoms remained elevated for up to 24 months after the reform. |
| <b>Rodgers et al. (2019)</b>          | U.S.      | Longitudinal with quasi-experimental variation (Panel study) | National Longitudinal Survey of Youths 1979 (NLSY79)<br>2000-2014 | Examining the relationship between housing affordability and risk factors for cardiovascular                                                                                        | Renters who were 'disease-free' prior to 2000 and experienced a change in the aggregated rent burden                            | <i>Aggregated housing cost burden</i><br>Change in the county-average proportion of total household income spent on rent (before vs. after the Great  | <i>Change in symptoms of depression</i><br>CES-D (before vs. after the Great Recession 2008)                                              | Each percentage point increase in county-level median percentage of housing cost burden was associated with increased odds of depression. The association was stronger for renters than for homeowners, although the association was no longer significant when restricting the sample to renters (OR = 1.20, 95 % CI: 0.92, 1.56; $p = .17$ ).                            |

| Study | Country | Study Design | Data Source & Years of Collection | Main Objective of Study | Study Population (Analytical Sample)                                 | Predictor Operationalization & Measurement<br><i>Housing Insecurity</i> | Outcome Operationalization & Measurement<br><i>Mental Health</i> | Main Findings |
|-------|---------|--------------|-----------------------------------|-------------------------|----------------------------------------------------------------------|-------------------------------------------------------------------------|------------------------------------------------------------------|---------------|
|       |         |              |                                   | disease                 | (complete case analysis)<br>Age 35-43 years<br>$N_{Renters} = 266^i$ | Recession in 2008)                                                      |                                                                  |               |

Notes: *CES-D 10* Center for Epidemiologic Studies – Depression Scale; *CIDI-SF* Composite International Diagnostic Interview Short-Form; *CMHS* Cook-Medley Hostility Scale; *GHQ-12* 12-item General Health Questionnaire; *K6* Abbreviated version of Kessler Psychological Distress Scale; *MCS* Mental Health Component Summary Score; *MHI-5* Mental Health Scale; *SF-36* Short Form 36 Health Survey; References for each mental health measurement test are provided in S5 Appendix.

<sup>a</sup>  $N_{Renters} = 12,306$  (before discounting cases with missing data on key variables, final sample not specified),  $N_{Total} =$  about 14,000 (1,500-1,900 per year)

<sup>b</sup> '30/40' measure= spending > 30 % of gross household income on rent and gross household income is in the bottom 40 % of the national distribution (Nepal et al., 2010)

<sup>c</sup>  $N_{Total} = 48,446$

<sup>d</sup> This review solely presents the descriptive findings of the study, as the regression analyses did not include stratified analyses for renters.

<sup>e</sup>  $N_{Total} = 2,239$  (8,481 responses)

<sup>f</sup>  $N_{Total} = 2,269$  (9,184 responses)

<sup>g</sup>  $N_{Total} = 2,916$  (12,064 observations)

<sup>h</sup> The primary data source for the paper was Journey Home (JH); however, the results are not incorporated within this review, as the control group of this sample is not restricted to renters but includes all individuals not in social housing

<sup>i</sup>  $N_{Total} = 3,722$ , of which  $N_{Renters} = 1,117$ ; final sample size  $N_{Total} = 713$  for depressive symptoms



304 **Table 2**305 *Summary characteristics of the included studies regarding housing instability and mental health (ordered alphabetically according to author's name)*

| Study                         | Country | Study Design                                      | Data Source & Years of Collection                          | Main Objective of Study                                                                                                                                          | Study Population (Analytical Sample)                                                                                                         | Predictor Operationalization & Measurement<br><i>Housing Insecurity</i>                                                                                                                           | Outcome Operationalization & Measurement<br><i>Mental Health</i>                                                                                                                                                                                                                          | Main Findings                                                                                                                                                                                                                                                                                                                                                                                                                                                                                                                                                                                                                                                                                  |
|-------------------------------|---------|---------------------------------------------------|------------------------------------------------------------|------------------------------------------------------------------------------------------------------------------------------------------------------------------|----------------------------------------------------------------------------------------------------------------------------------------------|---------------------------------------------------------------------------------------------------------------------------------------------------------------------------------------------------|-------------------------------------------------------------------------------------------------------------------------------------------------------------------------------------------------------------------------------------------------------------------------------------------|------------------------------------------------------------------------------------------------------------------------------------------------------------------------------------------------------------------------------------------------------------------------------------------------------------------------------------------------------------------------------------------------------------------------------------------------------------------------------------------------------------------------------------------------------------------------------------------------------------------------------------------------------------------------------------------------|
| <b>Acharaya et al. (2022)</b> | U.S.    | Cross-sectional                                   | Household Pulse Survey (HPS)<br>2021-2022                  | Examining the association between self-reported risk of eviction and anxiety, depression, and prescription medication use for mental or emotional health reasons | Renters not caught up with rent payments at the time of the survey<br>Age $\geq$ 18 years<br>$N = 14,548$                                    | <i>Risk of eviction</i><br>Self-reported likelihood of eviction in the next two months. Respondents who stated "very likely" or "somewhat likely" are considered as the at risk of eviction group | <i>Symptoms of depression</i><br>PHQ-2<br><br><i>Symptoms of anxiety</i><br>GAD-2<br><br><i>Usage of prescription medication for mental, emotional, or behavioral conditions</i><br>Whether a respondent took prescription medication for mental, emotional, or behavioral health reasons | The perceived risk of eviction among renters not caught up with rent payments was associated with elevated mental health problems. The odds of depression (OR = 2.4; 95 % CI: 2.36, 2.37; $p$ -value N/A), anxiety (OR = 2.7; 95 % CI: 2.65, 2.65; $p$ -value N/A), and prescription medication use (OR = 1.2; 95 % CI: 1.17, 1.17; $p$ -value N/A) were significantly higher in the at-risk eviction group than in the reference group.<br><br>Results from sensitivity analysis obtained after adjustment for medication use as the marker of pre-existing mental health conditions reinforced the similar magnitude of association between the risk of eviction and depression and anxiety. |
| <b>Ali &amp; Wehby (2022)</b> | U.S.    | Quasi-experimental/ repeated cross-sectional data | Behavioral Risk Factor Surveillance System (BRFSS)<br>2020 | Examining the short-term effects of the state eviction moratoriums in 2020 on the mental health status of renters                                                | Renters (Control group: homeowners to capture within-state trends)<br>Age $\geq$ 18 years<br>$N_{Renters} = 74,655$<br>$N_{Total} = 292,802$ | <i>Risk of eviction</i><br>Status and duration of eviction moratorium (state-level)                                                                                                               | <i>Mental health and well-being</i><br>Number of days not in good mental health during the previous 30 days<br><br><i>Frequent mental distress</i><br>Not having good mental health for 14 or more days in the past 30 days                                                               | State eviction moratoriums were associated with an improvement in mental health among renters, including 0.37 fewer days not in good mental health in the past 30 days ( $p < .01$ ) and a decline in the likelihood of reporting frequent mental distress by 1.3 percentage points ( $p < .05$ ).                                                                                                                                                                                                                                                                                                                                                                                             |
| <b>Burgard et al. (2012)</b>  | U.S.    | Cross-sectional                                   | Michigan Recession and Recovery Study (MRRS)               | Examining the associations between different types of housing instability <sup>a</sup> and several                                                               | Renters (complete case analysis)<br>Age 19-64 years<br>$N_{Renters} = 383^b$<br>( $n = 333$ excluding renters                                | <i>Behind on rent</i><br>"Are you currently behind on your rent?"                                                                                                                                 | <i>Symptoms of depression</i><br>PHQ-9<br><br><i>Anxiety attack</i><br>Anxiety item from the PHQ-brief instrument                                                                                                                                                                         | Renters who were behind on rent had approximately 3.7 times greater odds of exceeding the cut-off for depression compared to renters who had not experienced recent instability (OR = 3.66; 95 % CI: 1.15, 11.7, $p < .05$ ). However, when including participants with previous housing                                                                                                                                                                                                                                                                                                                                                                                                       |

| Study                                  | Country | Study Design                | Data Source & Years of Collection                                           | Main Objective of Study                                                                          | Study Population (Analytical Sample)                                                                                                                                                              | Predictor Operationalization & Measurement<br><i>Housing Insecurity</i>                                                                                                                                                                                    | Outcome Operationalization & Measurement<br><i>Mental Health</i>                                                               | Main Findings                                                                                                                                                                                                                                                                                                                                                                                                                                                                                                                                                                                                                                                                                                                                                                                                                                                                                                                                   |
|----------------------------------------|---------|-----------------------------|-----------------------------------------------------------------------------|--------------------------------------------------------------------------------------------------|---------------------------------------------------------------------------------------------------------------------------------------------------------------------------------------------------|------------------------------------------------------------------------------------------------------------------------------------------------------------------------------------------------------------------------------------------------------------|--------------------------------------------------------------------------------------------------------------------------------|-------------------------------------------------------------------------------------------------------------------------------------------------------------------------------------------------------------------------------------------------------------------------------------------------------------------------------------------------------------------------------------------------------------------------------------------------------------------------------------------------------------------------------------------------------------------------------------------------------------------------------------------------------------------------------------------------------------------------------------------------------------------------------------------------------------------------------------------------------------------------------------------------------------------------------------------------|
|                                        |         |                             | 2009-2010                                                                   | measures of health                                                                               | with prior housing instability)                                                                                                                                                                   |                                                                                                                                                                                                                                                            | <i>Problematic alcohol use</i><br>AUDIT                                                                                        | instability ( $N = 50$ ), those who were behind on rent were no longer more likely to exceed the cut-off for depression ( $p$ -value N/A). The associations between anxiety attacks (OR = 3.03; ; 95 % CI: 0.97, 9.42, $p$ -value N/A) and harmful alcohol use (OR = 2.99; ; 95 % CI: 0.45, 20.1, $p$ -value N/A) were not significant.                                                                                                                                                                                                                                                                                                                                                                                                                                                                                                                                                                                                         |
| <b>Chambers et al. (2015) [Part b]</b> | U.S.    | Cross-sectional             | Affordable Housing as an Obesity Mediating Environment (AHOME)<br>2011-2012 | See [Part a]                                                                                     | Low-income Latin American renters living in the Bronx, eligible for rental assistance (complete case analysis)<br>Age $\geq 18$ years<br>$N = 371$                                                | <i>Crowding</i><br>Perceived household crowding (4 items created by the authors)                                                                                                                                                                           | <i>Symptoms of depression</i><br>CES-D 10<br><br><i>Hostile affect</i><br>Items from the hostile affect subscale from the CMHS | Perceived crowding was not significantly associated with depressive symptomology (OR = 1.182; 95 % CI: 0.83, 1.69; $p$ -value N/A) but was significantly associated with an increased risk of hostile affect (OR = 1.821; 95 % CI: 1.16, 2.85; $p < 0.05$ ).                                                                                                                                                                                                                                                                                                                                                                                                                                                                                                                                                                                                                                                                                    |
| <b>Desmond &amp; Kimbro (2015)</b>     | U.S.    | Longitudinal (Cohort study) | Fragile Families and Child Wellbeing Study (FFCWS)<br>1998-2005             | Examining the consequences of involuntary displacement from housing for low-income urban mothers | Low-income urban mothers from rental households (at baseline) who persisted through the 4 <sup>th</sup> wave<br>Age N/A<br>$N = 2,676$ (propensity score weighting)<br>$n = 122$ (matched models) | <i>Eviction</i><br>“In the past 12 months, were you evicted from your home or apartment for not paying the rent or mortgage?”; two categories: early eviction (child age 0-1; 2-3), midrange eviction (child age 2-3) and recent eviction” (child age 4-5) | <i>Symptoms of depression</i><br>CIDI-SF (during the fourth wave of the study)                                                 | Mothers from low-income rental households who experienced a recent eviction were statistically more likely to report depression compared to mothers who did not. Specifically, the predicted probability difference ranged between 0.20-0.21 ( $p$ -values ranging from $< .01$ ) for both model specifications. Likewise, in the matched models the average treatment effect on the treated ranged between 0.20-0.22 ( $p$ -values ranging from $< .1$ to $< .05$ ).<br><br>The impact of eviction on maternal depression was long-lasting, enduring years after families were evicted, although its influence shrinks over time, indicated by a higher probability of depression even after early evictions ( $p < .05$ ). Results were robust to sensitivity analysis restricting evictions to those in which it was ensured that the exposure preceded the outcome measurement, indicated by a higher probability of depression for mothers |

| Study                           | Country | Study Design               | Data Source & Years of Collection                | Main Objective of Study                                                                                                                 | Study Population (Analytical Sample)                                                                                                                         | Predictor Operationalization & Measurement<br><i>Housing Insecurity</i>                                                                                                                                                                                                                                                                                                    | Outcome Operationalization & Measurement<br><i>Mental Health</i>                                                           | Main Findings                                                                                                                                                                                                                                                                                                                                                                                                                                                                                                                                                                                                                                                                                                                                                                                                        |
|---------------------------------|---------|----------------------------|--------------------------------------------------|-----------------------------------------------------------------------------------------------------------------------------------------|--------------------------------------------------------------------------------------------------------------------------------------------------------------|----------------------------------------------------------------------------------------------------------------------------------------------------------------------------------------------------------------------------------------------------------------------------------------------------------------------------------------------------------------------------|----------------------------------------------------------------------------------------------------------------------------|----------------------------------------------------------------------------------------------------------------------------------------------------------------------------------------------------------------------------------------------------------------------------------------------------------------------------------------------------------------------------------------------------------------------------------------------------------------------------------------------------------------------------------------------------------------------------------------------------------------------------------------------------------------------------------------------------------------------------------------------------------------------------------------------------------------------|
|                                 |         |                            |                                                  |                                                                                                                                         |                                                                                                                                                              |                                                                                                                                                                                                                                                                                                                                                                            |                                                                                                                            | experiencing midrange evictions ( $p < .01$ ).                                                                                                                                                                                                                                                                                                                                                                                                                                                                                                                                                                                                                                                                                                                                                                       |
| <b>Kim &amp; Burgard (2022)</b> | U.S.    | Longitudinal (Panel study) | MRRS 2009-2011                                   | Examining whether housing insecurity is associated with mental health among renters in the aftermath of the Great Recession of 2007-09. | Renters across all three waves (complete case analysis)<br>Age 19-64 years<br>$N = 255$ (510 observations)                                                   | <p><i>Eviction</i><br/>If respondents experienced eviction (threatened, in progress, or completed)</p> <p><i>Moving in with others</i><br/>If respondents had moved in with others to save on costs</p> <p><i>Moved for cost</i><br/>If respondents experienced cost-related move</p> <p><i>Multiple moves</i><br/>If respondents moved more than twice over follow-up</p> | <p><i>Anxiety attack</i><br/>Anxiety item from the PHQ-brief instrument</p> <p><i>Symptoms of depression</i><br/>PHQ-9</p> | <p>Respondents who had to move for cost reasons were more likely to experience anxiety attacks at follow-up by 16 percentage points (<math>p &lt; .01</math>), with all other individual types of housing instability showing positive but non-significant associations with anxiety attacks (eviction: <math>p &lt; .1</math>; moving in with others and multiple moves <math>p</math>-values N/A).</p> <p>Respondents who experienced eviction over follow-up were more likely to meet criteria for depression at follow-up by 13 percentage points (<math>p &lt; .05</math>). Multiple moves were marginally associated with depression (<math>p &lt; .1</math>). All other specific types of housing instability show positive but non-significant associations with depression (<math>p</math>-values N/A).</p> |
| <b>Leifheit et al. (2021)</b>   | U.S.    | Longitudinal (Panel study) | Understanding Coronavirus in America Survey 2020 | Examining which eviction protections were associated with reduced mental distress among renters during the COVID-19 pandemic            | Low-income renters (renting at any wave of the study) and who specified their state of residence<br>Age $\geq 18$ years<br>$N = 2,317$ (20,853 observations) | <p><i>Risk of eviction</i><br/>Time-varying strength of state-level eviction moratorium (none, weak, strong)</p>                                                                                                                                                                                                                                                           | <p><i>Mental health and well-being</i><br/>PHQ4</p>                                                                        | <p>Moratoriums that blocked landlords from giving notice for evictions (strong) were associated with a relative reduction in mental distress of 13 % (risk ratio = 0.87; 95 % CI: 0.76, 0.99; <math>p</math>-value N/A), whereas protections that blocked only court hearings, judgments, and enforcement (weak) did not reduce distress significantly (risk ratio = 0.96; 95 % CI, 0.86, 1.06; <math>p</math>-value N/A). Results were robust to a number of sensitivity analyses.</p> <p>Strong moratoriums were associated with larger reductions in mental distress in states with high rental cost burden at baseline than those with lower rental cost burden.</p>                                                                                                                                             |

| Study                        | Country   | Study Design               | Data Source & Years of Collection                                            | Main Objective of Study                                                                                                             | Study Population (Analytical Sample)                                                                           | Predictor Operationalization & Measurement<br><i>Housing Insecurity</i>                                                                                                             | Outcome Operationalization & Measurement<br><i>Mental Health</i>                                                | Main Findings                                                                                                                                                                                                                                                                                                                                                                                                                                                                                                                                                                                  |
|------------------------------|-----------|----------------------------|------------------------------------------------------------------------------|-------------------------------------------------------------------------------------------------------------------------------------|----------------------------------------------------------------------------------------------------------------|-------------------------------------------------------------------------------------------------------------------------------------------------------------------------------------|-----------------------------------------------------------------------------------------------------------------|------------------------------------------------------------------------------------------------------------------------------------------------------------------------------------------------------------------------------------------------------------------------------------------------------------------------------------------------------------------------------------------------------------------------------------------------------------------------------------------------------------------------------------------------------------------------------------------------|
| <b>Li et al. (2022)</b>      | Australia | Longitudinal (Panel study) | Household, Income and Labour Dynamics in Australia (HILDA) 2001-2019         | Examining the impact of tenure instability on mental health and psychological distress among a low-income working-age population    | Low-income private renters<br>Age 25-65 years<br>$N_{Renters} = 3,579^c$<br>(17,163 observations)              | <i>Frequency of transitions</i><br>Average number of transitions every 5 years in the current tenure<br><br><i>Duration of occupancy</i><br>Number of years in the current dwelling | <i>Mental health and well-being</i><br>MHI-5 from the SF-36<br><br><i>Psychological distress</i><br>K10         | More frequent transitions were significantly associated with lower levels of mental health (MH: $-1.26$ , 95 % CI: $-2.00$ , $-0.51$ ; rescaled K10: $-0.92$ , 95 % CI: $-1.84$ , $-0.003$ ; $p$ -value N/A).<br><br>Longer occupancy was significantly associated with higher levels of mental health, as indicated by positive and significant $\beta_2 + \beta_3$ ( $p$ -value N/A).<br><br>Residential stability was particularly beneficial for renters in early middle adulthood (35–44 years). The study's sensitivity analyses to reduce residual confounding supported these findings |
| <b>Park &amp; Seo (2020)</b> | Korea     | Longitudinal (Panel study) | Korean Welfare Panel (KoWePS) 2006-2019                                      | Examining the associations between residential instability and perceived health status of renters                                   | Renters<br>Age $\geq 18$ years<br>$N = 6,119$<br>(28,887 observations)                                         | <i>Residential instability</i><br>Respondents had experienced overdue rent for two months or more or relocation because they could not pay their rent                               | <i>Overall Depression</i><br>Depression index questionnaire, symptoms experienced by individuals over past week | Residential instability significantly increased overall depression level when comparing renters with and without exposure to residential instability ( $p < .001$ ).                                                                                                                                                                                                                                                                                                                                                                                                                           |
| <b>Pevalin (2009)</b>        | UK        | Longitudinal (Panel study) | British Household Panel Survey (BHPS) 1991-2008                              | Investigating whether repossessions and evictions increase the likelihood of common mental illness and examining patterns over time | Renters (at baseline, complete case analysis)<br>Age N/A<br>$N_{Renters} = 3,899^d$<br>(person/years = 22,744) | <i>Eviction</i><br>Respondents who had moved since their last interview were asked why they had moved; one possible response was "eviction"                                         | <i>Common mental illness</i><br>GHQ-12                                                                          | Evicted renters exhibited elevated levels of common mental illness immediately prior to the event, but there was no significant association between the eviction event and an increased risk of mental illness after the event (OR: $.97$ , 95 % CI: $.76$ , $1.20$ ; $p$ -value N/A).                                                                                                                                                                                                                                                                                                         |
| <b>Sandel et al. (2018)</b>  | U.S.      | Cross-sectional            | Household-level surveys and medical record audits by Children's Health Watch | Evaluating how housing instability relates to caregiver and child health among low-                                                 | Caregivers of small children in low-income rental households                                                   | <i>Behind on Rent</i><br>"During the last 12 months, was there a time when you were not able to pay the mortgage or rent on                                                         | <i>Maternal depressive symptoms</i><br>3-item screening test developed for maternal depression                  | Compared with caregivers in stable housing, caregivers who were behind on rent had increased adjusted odds of maternal depressive symptoms (aOR: $2.71$ ; 95 % CI: $2.51$ , $2.93$ ; $p$ -value N/A).<br><br>Compared with caregivers in stable housing, caregivers with multiple moves had                                                                                                                                                                                                                                                                                                    |

| Study                     | Country | Study Design                | Data Source & Years of Collection | Main Objective of Study                                                                  | Study Population (Analytical Sample)                                                                                                           | Predictor Operationalization & Measurement<br><i>Housing Insecurity</i>                                                      | Outcome Operationalization & Measurement<br><i>Mental Health</i>                                                                                                                                                                                                                                                                                                                                                                                                                                                                             | Main Findings                                                                                                                                                                                                          |
|---------------------------|---------|-----------------------------|-----------------------------------|------------------------------------------------------------------------------------------|------------------------------------------------------------------------------------------------------------------------------------------------|------------------------------------------------------------------------------------------------------------------------------|----------------------------------------------------------------------------------------------------------------------------------------------------------------------------------------------------------------------------------------------------------------------------------------------------------------------------------------------------------------------------------------------------------------------------------------------------------------------------------------------------------------------------------------------|------------------------------------------------------------------------------------------------------------------------------------------------------------------------------------------------------------------------|
|                           |         |                             | 2009-2015                         | income renter households.                                                                | Age N/A<br><br>N = 22,324                                                                                                                      | time?"<br><br><i>Multiple moves</i><br>More than one move in the past 12 months.                                             |                                                                                                                                                                                                                                                                                                                                                                                                                                                                                                                                              | increased adjusted odds of maternal depressive symptoms (aOR: 3.67; 95 % CI: 3.22, 4.17; <i>p</i> -value N/A).                                                                                                         |
| <b>Tsai et al. (2021)</b> | U.S.    | Longitudinal (Cohort study) | 2017/2018                         | Assessing housing and mental health outcomes for a cohort of eviction court participants | Renters (at baseline) with a residential eviction case at the New Haven Eviction Court in 2017/18<br><br>Age ≥ 18 years<br>N = 89 <sup>e</sup> | <i>Residential mobility after eviction</i><br><br>Participants who had to move vs. did not have to move after eviction court | <i>Mental health and well-being</i><br>MCS from the SF-12v2<br><br><i>PTSD</i><br>PCL-5<br><br><i>Depression and anxiety</i><br>PHQ-4<br><br><i>Psychological distress</i><br>Subscales from the BSI <sup>f</sup><br><br><i>Quality of Life</i><br>Q-LES-Q-SF<br><br><i>Suicidal ideation</i><br>If participants had suicide attempts in the past 2 years<br><br><i>Receipt of any mental health or substance abuse treatment</i><br>If participants received any treatment for mental health, alcohol, or drug problems in the past 30 days | There were no significant changes in mental health symptoms, suicidal ideation, or utilization of mental health treatment services between groups over time (baseline to 1, 3, 6, and 9 months; <i>p</i> -values N/A). |

| Study                             | Country   | Study Design               | Data Source & Years of Collection                                                  | Main Objective of Study                                                                                                                                              | Study Population (Analytical Sample)                                                                                                                                  | Predictor Operationalization & Measurement<br><i>Housing Insecurity</i>                                                                                                                                                                                                                                                                             | Outcome Operationalization & Measurement<br><i>Mental Health</i>                                                                                                                                                                                        | Main Findings                                                                                                                                                                                                                                                                                                                                                                                                                                                                                                                                                                                                                                                                 |
|-----------------------------------|-----------|----------------------------|------------------------------------------------------------------------------------|----------------------------------------------------------------------------------------------------------------------------------------------------------------------|-----------------------------------------------------------------------------------------------------------------------------------------------------------------------|-----------------------------------------------------------------------------------------------------------------------------------------------------------------------------------------------------------------------------------------------------------------------------------------------------------------------------------------------------|---------------------------------------------------------------------------------------------------------------------------------------------------------------------------------------------------------------------------------------------------------|-------------------------------------------------------------------------------------------------------------------------------------------------------------------------------------------------------------------------------------------------------------------------------------------------------------------------------------------------------------------------------------------------------------------------------------------------------------------------------------------------------------------------------------------------------------------------------------------------------------------------------------------------------------------------------|
| <b>Vasquez-Vera et al. (2022)</b> | Spain     | Cross-sectional            | Survey of the Living Conditions of Renters in the Barcelona Metropolitan Area 2019 | Analyzing by gender the relationship of forced displacements due to neglected housing insecurity with the physical and mental health of renters in Barcelona in 2019 | Renters living in Barcelona city, without formal eviction<br>Age $\geq 18$ years<br>$N = 1,605^a$                                                                     | <i>Neglected housing insecurity</i><br>Had to move in the last 5 years due to legal (LHI) or economic (EHI) housing insecurity                                                                                                                                                                                                                      | <i>Mental health and well-being</i><br>Short version of the WEMWBS                                                                                                                                                                                      | The probability of worse mental health outcomes was greater in those affected by economic housing insecurity, followed by those affected by legal housing insecurity, both compared to those who have not been affected by housing insecurity. In those affected for economic reasons, this association was significant even after adjusting for socioeconomic and other housing variables, in women PR: 1.17 (95 % CI: 1.03, 1.33; $p$ -value N/A), in men PR: 1.21 (95 % CI: 1.01, 1.43; $p$ -value N/A) but not significant in those affected for legal reasons, in women PR: 1.1 (95 % CI: 1.0, 1.3; $p$ -value N/A), in men PR: 1.0 (95 % CI: 0.8, 1.2; $p$ -value N/A). |
| <b>Vifor et al. (2023)</b>        | Australia | Longitudinal (Panel study) | HILDA 2001-2018                                                                    | Examining how the links between forced housing mobility and mental well-being may vary according to states of employment and housing tenure insecurity               | Private renters (at baseline)<br>Age $\geq 15$ years<br>$N_{Renters} = 10,580$ for SF-36 (44,534 observations)<br>$N_{Renters} = 7,413$ for K10 (16,542 observations) | <i>Residential mobility</i><br>Three categories of mobility in the last year: forced housing mobility (moves due to eviction, property no longer available, living in government housing with no choice but to move, or moves made by those who had reported difficulty paying rent during the year) vs. voluntary vs. non-housing-related mobility | <i>Mental health and well-being</i><br>MHI-5 from the SF-36<br><br><i>Psychological distress</i><br>K10<br><br><i>Role limitation, emotional</i><br>Role-emotional from the SF-36<br><br><i>Social functioning</i><br>Social functioning from the SF-36 | Forced housing mobility reduced the mental health score by 1.2 ( $p < .01$ ) and increased the psychological distress score by 0.6 ( $p < .01$ ) for private renters compared to an absence of mobility (within-person effects). The odds of experiencing a high social functioning (OR: 0.8, $p < .01$ ) were significantly lower when a forced move occurred compared to when a move did not occur. No significant differences in the odds of experiencing a role-emotional impairment were observed (OR: 0.9, $p < .1$ ).                                                                                                                                                  |

**Notes:** *AUDIT* Alcohol Use Disorders Identification Test; *BSI* Brief Symptom Inventory; *CES-D 10* Center for Epidemiologic Studies – Depression Scale; *CIDI-SF* Composite International Diagnostic Interview Short-Form; *CMHS* Cook-Medley Hostility Scale; *GAD-2* Generalized Anxiety Disorder Scale-2; *GHQ-12* 12-item General Health Questionnaire; *K10* Kessler Psychological Distress Scale; *MCS* Mental Health Component Summary Score; *MHI-5* Mental Health Scale; *PCL-5* Posttraumatic Stress Disorder Checklist for DSM-5; *PHQ* Patient Health Questionnaire; *Q-LES-Q-SF* Quality of Life Enjoyment and Satisfaction Questionnaire-Short Form; *SF-36* Short Form 36 Health Survey; *SF-12v2* Abbreviated version of SF-36, version 2; *WEMWBS* Warwick-Edinburgh Mental Wellbeing Scale; References for each mental health measurement test are provided in S5 Appendix.

<sup>a</sup> the study examined eight types of housing instability; however, only the variable “behind on rent” was analyzed separately for the group of renters.

<sup>b</sup>  $N_{Total} = 894$

| Study                                                                                                                                                                                                                                                                                                                                                                                                                                                                                                                                                                                                                                                                                                                                                                                                    | Country | Study Design | Data Source & Years of Collection | Main Objective of Study | Study Population (Analytical Sample) | Predictor Operationalization & Measurement<br><i>Housing Insecurity</i> | Outcome Operationalization & Measurement<br><i>Mental Health</i> | Main Findings |
|----------------------------------------------------------------------------------------------------------------------------------------------------------------------------------------------------------------------------------------------------------------------------------------------------------------------------------------------------------------------------------------------------------------------------------------------------------------------------------------------------------------------------------------------------------------------------------------------------------------------------------------------------------------------------------------------------------------------------------------------------------------------------------------------------------|---------|--------------|-----------------------------------|-------------------------|--------------------------------------|-------------------------------------------------------------------------|------------------------------------------------------------------|---------------|
| <p><sup>c</sup> <math>N_{Total} = 7,059</math> (42,067 observations)</p> <p><sup>d</sup> <math>N_{Total} = 12,390</math> (139,928 person/years)</p> <p><sup>e</sup> <math>N_{Total} = 121</math>, the final analytical example was smaller due to loss to follow-up and <math>N = 2</math> participants reporting that they moved before appearing at eviction court.</p> <p><sup>f</sup> The specific BSI subscale was unclear due to conflicting information. In the text, the authors mentioned the depression, anxiety, and psychoticism subscales, whereas in the tables, reference hostility, paranoia, and psychoticism subscales were referenced.</p> <p><sup>g</sup> All persons not identifying with binary gender were excluded due to a very small number of cases (<math>N = 32</math>)</p> |         |              |                                   |                         |                                      |                                                                         |                                                                  |               |



307 **Exposure measurements of housing insecurity**

308 Of the 22 studies included in the review, eight focused solely on housing affordability,  
 309 while 13 examined housing instability (see Table 3), and one study investigated both  
 310 dimensions. Housing affordability was primarily operationalized using some form of  
 311 rent-to-income ratio, while housing instability was mainly assessed through indicators of  
 312 forced moves. With the exception of three studies that employed population-level  
 313 aggregated measures (Ali & Wehby, 2022; Leifheit et al., 2021; Rodgers et al., 2019), the  
 314 remaining studies relied on individual participant and self-reported information to assess  
 315 housing insecurity.

316 **Table 3**

317 *Summary of exposure operationalizations used in the included studies*

| Housing insecurity dimension      | Exposure operationalizations                                                                              |                                                                                                       | Studies                                              |
|-----------------------------------|-----------------------------------------------------------------------------------------------------------|-------------------------------------------------------------------------------------------------------|------------------------------------------------------|
| <b>Housing (un-)affordability</b> | Rent/income ratio                                                                                         | Housing cost burden in a low-income sample (equivalent to '30/40' measure)                            | <i>Bentley et al., (2016); Elliott et al. (2021)</i> |
|                                   |                                                                                                           | Housing affordability stress/ '30/40' measure                                                         | <i>Arundel et al. (2022); Mason et al. (2013)</i>    |
|                                   |                                                                                                           | Housing affordability stress pattern                                                                  | <i>Baker et al. (2020)</i>                           |
|                                   |                                                                                                           | Aggregated housing cost burden                                                                        | <i>Rodgers et al. (2019)</i>                         |
|                                   | Amount of 'out-of-pocket rent'/ residual income                                                           | Amount of housing benefits                                                                            | <i>Reeves et al. (2016)</i>                          |
|                                   |                                                                                                           | Receiving housing assistance                                                                          | <i>Chambers et al. (2015)</i>                        |
|                                   |                                                                                                           | Living in social housing                                                                              | <i>Prentice &amp; Scutella (2020)</i>                |
| <b>Housing (in-)stability</b>     | Forced moves due to legal or economic issues                                                              | <i>Kim &amp; Burgard (2022); Tsai et al. (2021); Vásquez-Vera et al. (2022); ViforJ et al. (2022)</i> |                                                      |
|                                   | Eviction                                                                                                  | <i>Desmond &amp; Kimbro (2015); Kim &amp; Burgard (2022); Pevalin (2009)</i>                          |                                                      |
|                                   | Risk of eviction                                                                                          | <i>Acharya et al. (2022); Ali &amp; Wehby (2022); Leifheit et al. (2021)</i>                          |                                                      |
|                                   | Frequency measure of moving                                                                               | <i>Kim &amp; Burgard (2022); Li et al. (2022); Sandel et al. (2018)</i>                               |                                                      |
|                                   | Crowding/ moving in with others to save costs                                                             | <i>Chambers et al. (2015); Kim &amp; Burgard (2022)</i>                                               |                                                      |
|                                   | Behind on rent                                                                                            | <i>Burgard et al. (2012); Sandel et al. (2018)</i>                                                    |                                                      |
|                                   | Combined measure of residential instability (being behind on rent or relocation due to financial reasons) | <i>Park &amp; Seo (2020)</i>                                                                          |                                                      |
|                                   | Duration of occupancy                                                                                     | <i>Li et al. (2022)</i>                                                                               |                                                      |

318

319 **Outcome measurement of mental health**



320 The studies included in the review employed heterogeneous operationalizations of  
 321 mental health outcomes (see Table 4). Twelve studies measured overall mental health,  
 322 well-being, and/or distress, summarized here as “overall mental health”. Three studies used  
 323 measures of psychosocial functioning, such as hostility or interpersonal functioning.  
 324 Additionally, 11 studies focused on symptoms of mental disorders, primarily examining  
 325 symptoms of depression. One study investigated suicidal ideation. Two studies explored  
 326 changes in mental health treatment, including the prescription of medication for mental  
 327 health purposes. The majority of the selected studies utilized screening tools to measure  
 328 symptoms of mental disorders, such as the Patient Health Questionnaire-2 (PHQ-2; Kroenke  
 329 et al., 2003) or screening for maternal depression. Moreover, with the exception of one study  
 330 in which trained clinical interviewers conducted home interviews (Chambers et al., 2015) and  
 331 two studies that used a clinical-diagnostic interview (Desmond & Kimbro, 2015; Elliott et al.,  
 332 2021), all other studies relied on self-report outcome instruments.

333 **Table 4**

334 *Summary of outcome operationalizations and measurement instruments used in the included studies*

| Operationalizations                                                  | Outcome measure                                                                                                          | Studies                                                                                        |
|----------------------------------------------------------------------|--------------------------------------------------------------------------------------------------------------------------|------------------------------------------------------------------------------------------------|
| <b>Overall mental health, well-being, and psychological distress</b> | MCS summary score including the subscales vitality, social functioning, role-emotional, and mental health from the SF-36 | <i>Arundel et al. (2022); Baker et al. (2020); Bentley et al. (2016); Mason et al. (2013)</i>  |
|                                                                      | MH/MHI-5 from the SF-36                                                                                                  | <i>Li et al. (2022); Prentice &amp; Scutella (2020); ViforJ et al. (2022)</i>                  |
|                                                                      | MCS of the SF-12, abbreviated version of the SF-36                                                                       | <i>Tsai et al. (2021)</i>                                                                      |
|                                                                      | GHQ-12                                                                                                                   | <i>Bentley et al. (2016); Pevalin (2009)</i>                                                   |
|                                                                      | WEMWBS                                                                                                                   | <i>Vásquez-Vera et al. (2022)</i>                                                              |
|                                                                      | K10                                                                                                                      | <i>ViforJ et al. (2022); Li et al. (2022)</i>                                                  |
|                                                                      | Abbreviated version of K10 (K6)                                                                                          | <i>Prentice &amp; Scutella (2020)</i>                                                          |
|                                                                      | PHQ-4                                                                                                                    | <i>Leifheit et al. (2021)</i>                                                                  |
|                                                                      | Subscales of the BSI                                                                                                     | <i>Tsai et al. (2021)</i>                                                                      |
|                                                                      | Number of days in good mental health (previous 30 days)                                                                  | <i>Ali &amp; Wehby (2022)</i>                                                                  |
| Not having good mental health for $\geq 14$ days (previous 30 days)  | <i>Ali &amp; Wehby (2022)</i>                                                                                            |                                                                                                |
| <b>Psychosocial functioning</b>                                      | Role limitation                                                                                                          | Role-emotional from the SF-36<br><i>ViforJ et al. (2022)</i>                                   |
|                                                                      | Social functioning                                                                                                       | Social functioning from the SF-36<br><i>ViforJ et al. (2022)</i>                               |
|                                                                      | Quality of life/ Psychosocial status                                                                                     | Q-LES-Q-SF<br><i>Tsai et al. (2021)</i>                                                        |
|                                                                      | Hostility                                                                                                                | Hostile affect (Ho) subscale from the CMHS<br><i>Chambers et al. (2015)</i>                    |
| <b>Symptoms of mental disorders</b>                                  | Depression                                                                                                               | Depression items from the CIDI-SF<br><i>Desmond &amp; Kimbro (2015); Elliott et al. (2021)</i> |
|                                                                      |                                                                                                                          | CES-D 10<br><i>Chambers et al. (2015); Rodgers et al. (2019)</i>                               |
|                                                                      |                                                                                                                          | PHQ-9<br><i>Burgard et al. (2012); Kim &amp;</i>                                               |

|                                |                                                                                  |                                                         |
|--------------------------------|----------------------------------------------------------------------------------|---------------------------------------------------------|
|                                |                                                                                  | <i>Burgard (2022)</i>                                   |
|                                | PHQ-2                                                                            | <i>Acharaya et al. (2022)</i>                           |
|                                | Depression index questionnaire                                                   | <i>Park &amp; Seo (2020)</i>                            |
|                                | Current problems with depression, bad nerves, or anxiety                         | <i>Reeves et al. (2016)</i>                             |
|                                | 3-item screening test for maternal depression                                    | <i>Sandel et al. (2018)</i>                             |
| Anxiety                        | Anxiety item from the PHQ-brief                                                  | <i>Burgard et al. (2012) ; Kim &amp; Burgard (2022)</i> |
|                                | GAD-2                                                                            | <i>Acharaya et al. (2022)</i>                           |
| Depression & anxiety combined  | PHQ-4                                                                            | <i>Tsai et al. (2021)</i>                               |
|                                | PTSD                                                                             | <i>Tsai et al. (2021)</i>                               |
|                                | PCL-5                                                                            | <i>Tsai et al. (2021)</i>                               |
|                                | Problematic alcohol use                                                          | <i>Burgard et al. (2012)</i>                            |
| <b>Mental health treatment</b> | Receipt of any treatment for mental health, drug, or alcohol problems            | <i>Tsai et al. (2021)</i>                               |
|                                | Usage of prescription medication for mental, emotional, or behavioral conditions | <i>Acharaya et al. (2022)</i>                           |
| Suicidal ideation and behavior | Suicidal ideation                                                                | <i>Tsai et al. (2021)</i>                               |

*Notes: AUDIT Alcohol Use Disorders Identification Test; BSI Brief Symptom Inventory; CES-D 10 Center for Epidemiologic Studies – Depression Scale; CIDI-SF Composite International Diagnostic Interview Short-Form; CMHS Cook-Medley Hostility Scale; GAD-2 Generalized Anxiety Disorder Scale-2; GHQ-12 12-item General Health Questionnaire; K10 Kessler Psychological Distress Scale; K6 Abbreviated version of Kessler Psychological Distress Scale; MCS Mental Health Component Summary Score; MHI-5 Mental Health Scale; PCL-5 Posttraumatic Stress Disorder Checklist for DSM-5; PHQ Patient Health Questionnaire; Q-LES-Q-SF Quality of Life Enjoyment and Satisfaction Questionnaire-Short Form; SF-36 Short Form 36 Health Survey; SF-12v2 Abbreviated version of SF-36, version 2; WEMWBS Warwick-Edinburgh Mental Wellbeing Scale; References for each mental health measurement test are provided in S5 Appendix.*

### 335 **Reporting quality**

336 A detailed evaluation of every item of the respective reporting guidelines for each  
 337 study is provided in S4 Appendix. With the exception of Leifheit et al. (2021), none of the  
 338 included studies explicitly stated adherence to reporting guidelines. Despite this, the  
 339 included studies generally demonstrated satisfactory reporting quality, with authors  
 340 transparently reporting essential information such as rationale and objectives, employed  
 341 variables, analytical approaches, descriptive and analytical results, and at least some  
 342 limitations. Nevertheless, the critical appraisal of the reporting quality revealed some flaws  
 343 that impeded accurate data extraction, methodological assessment, and potentially the  
 344 replication of study findings.

345 One frequently omitted aspect in the method section was the numerical reporting of  
 346 psychometric properties of the outcome instruments (references to validation studies are not  
 347 considered sufficient for the STROBE statement). Additionally, some studies did not address  
 348 the psychometric properties of the measurements of housing insecurity at all. Furthermore,  
 349 since the majority of studies included in this review were based on secondary analyses of

350 survey data, some specific aspects need to be considered. While all studies reported the  
351 source and most important characteristics of the original data set, some did not provide  
352 comprehensive information on recruitment, missing data, follow-up procedure, as well as  
353 loss to follow-up (for the longitudinal studies), study size, and funding source. Regarding the  
354 findings, a number of studies did not report confidence intervals and most studies did not  
355 report unadjusted results. Moreover, an evaluation using the TREND statement indicated  
356 specific omissions in the studies using quasi-experimental methods. These include missing  
357 details about the “intervention” (item 4), such as content and exposure time span, as well as  
358 missing baseline characteristics and comparison of the study groups at baseline (item 14).

359 The studies employed a variety of statistical models based on their individual study  
360 design and dataset. Most of the studies utilized appropriate and robust methods, taking into  
361 account relevant covariates. However, two studies conducted only bivariate analyses without  
362 accounting for potential confounders, which indicates a significant risk of bias (Baker, Lester,  
363 et al., 2020; J. Tsai et al., 2021). Additionally, three studies (Chambers et al., 2015; Sandel  
364 et al., 2018; C. Vásquez-Vera et al., 2022) failed to consider income as an important  
365 potential confounder.

## 366 **Study results**

### 367 *Housing Affordability and Mental Health*

368 Of the nine studies examined in this review that investigated the association between  
369 housing affordability and mental health among renters, six found that unaffordable housing  
370 was significantly associated with a decline in mental health. Five of these studies employed  
371 a longitudinal design (Arundel et al., 2022; Baker, Lester, et al., 2020; Bentley et al., 2016;  
372 Elliott et al., 2021; Mason et al., 2013) and one a quasi-experimental design (Reeves et al.,  
373 2016). One quasi-experimental study (Prentice & Scutella, 2020) reported an inverse  
374 association, while one cross-sectional (Chambers et al., 2015) and one longitudinal study  
375 (Rodgers et al., 2019) found no significant association between housing affordability and  
376 mental health.

377           The majority of the studies (eight out of nine) on affordability focused on the low-  
378 income population, either directly, by limiting their sample to low-income households, or  
379 indirectly, by utilizing the ‘30/40’ measure. Only one study, conducted by Rodgers et al.  
380 (2019), analyzed the general population of renters, while another study, by Mason et al.  
381 (2013), conducted an additional analysis investigating high-income renters; both studies  
382 found no association. Among the findings specific to low-income renters, six showed  
383 statistical significance (Arundel et al., 2022; Baker et al., 2019; Baker, Lester, et al., 2020;  
384 Elliott et al., 2021; Mason et al., 2013; Reeves et al., 2016), whereas two yielded non-  
385 significant results (Chambers et al., 2015; Prentice & Scutella, 2020).

386           When considering only those studies that measured overall mental health, the  
387 majority (four out of five) demonstrated a significant association between unaffordable  
388 housing and worse overall mental health. Specifically, three studies found that high rental  
389 burden had a negative impact on the overall mental health of both Australian public renters  
390 (Baker, Lester, et al., 2020) and private renters (Bentley et al., 2016; Mason et al., 2013). A  
391 similar trend was confirmed by Arundel et al. (2022) for the Netherlands. Two of the studies  
392 reported no significant association for private renters in the UK (Bentley et al., 2016) and in  
393 Australia (Baker, Lester, et al., 2020). Prentice and Scutella (2020) found an inverse  
394 association, indicating that those living in social housing had significantly worse overall  
395 mental health than the matched control group in the private rental sector.

396           Four studies explored the association between housing affordability and depressive  
397 symptoms among renters. Elliott et al. (2021) found a significant positive association  
398 between rent burden and maternal depression. Rodgers et al. (2019) found a positive  
399 association between aggregated rent burden and depressive symptoms in a sample across  
400 tenures, which was not statistically significant when only the smaller subsample of renters  
401 was analyzed. Reeves et al. (2016) observed a significant increase in renters’ symptoms of  
402 depression after the reduction of housing benefits. In a sample of low-income Latin American

403 renters, neither depressive symptoms nor hostile affect were significantly associated with  
404 receiving rental assistance (Chambers et al., 2015).

#### 405 *Housing Instability and Mental Health*

406 Of the 14 studies that examined the link between housing instability and mental  
407 health, 12 reported one or more significant associations between unstable housing and  
408 poorer mental health among renters. Six of these studies employed a longitudinal design  
409 (Desmond & Kimbro, 2015; Kim & Burgard, 2022; Leifheit et al., 2021; A. Li et al., 2022; Park  
410 & Seo, 2020; ViforJ et al., 2022), five a cross-sectional design (Acharya et al., 2022; Burgard  
411 et al., 2012; Chambers et al., 2015; Sandel et al., 2018; C. Vásquez-Vera et al., 2022), and  
412 one a quasi-experimental design (Ali & Wehby, 2022). Two longitudinal studies found no  
413 significant associations (Pevalin, 2009; J. Tsai et al., 2021).

414 When considering only those studies that specifically measured overall mental  
415 health, five out of seven reported a significant association between unstable housing and  
416 poorer mental health. Specifically, Leifheit et al. (2021) and Ali and Wehby (2022) observed  
417 a positive association between the eviction moratorium implemented in the U.S. in response  
418 to the COVID-19 pandemic and improved mental health of renters. Additionally, three  
419 studies found that experiencing forced mobility (C. Vásquez-Vera et al., 2022; ViforJ et al.,  
420 2022), or a higher frequency of moves (A. Li et al., 2022), respectively, were associated with  
421 a negative impact on the mental health of private renters in Australia and Spain. Conversely,  
422 longer duration in the rental property was linked to improved mental health (A. Li et al.,  
423 2022). Two studies which focused on eviction (Pevalin, 2009) and forced mobility after  
424 eviction (J. Tsai et al., 2021) did not find any statistically significant association with overall  
425 mental health.

426 When examining the studies that investigated depressive symptoms as outcome  
427 measures, the majority (seven out of eight) found a significant association between unstable  
428 housing and a rise in depressive symptoms. Indicators including (risk of) eviction, forced  
429 moves, multiple moves, and being behind on rent showed a link to increased depressive

430 symptoms (Acharya et al., 2022; Burgard et al., 2012; Chambers et al., 2015; Desmond &  
431 Kimbro, 2015; Kim & Burgard, 2022; Park & Seo, 2020; Sandel et al., 2018). However, two  
432 studies, which examined subjective crowding (Chambers et al., 2015) and moving in with  
433 others as well as forced mobility (Kim & Burgard, 2022), did not find a significant association  
434 with depressive symptoms.

435 Three studies examining symptoms of anxiety were included in the review. The  
436 results revealed that subjective risk of eviction (Acharya et al., 2022) and forced mobility  
437 (Kim & Burgard, 2022) were significantly associated with greater anxiety symptoms. The  
438 other measures examined in the study by Kim and Burgard (2022), including eviction,  
439 multiple moves, and moving in with others, as well as being behind on rent in the study by  
440 Burgard et al. (2012), were not found to be significantly associated with anxiety.

441 Furthermore, the review included one study on symptoms of PTSD (J. Tsai et al.,  
442 2021), one on alcohol abuse (Burgard et al., 2012), and one on a combined measure of  
443 depression and anxiety (J. Tsai et al., 2021). J. Tsai et al. (2021) was the only study to  
444 investigate suicidal ideation. None of these studies found a significant association between  
445 unstable housing and these mental health outcomes. However, one study reported a higher  
446 prevalence of prescription medication for mental health reasons (Acharya et al., 2022), while  
447 mental health treatment as an outcome measure was not found to be significant in the other  
448 study (J. Tsai et al., 2021). Finally, two studies reported a significant association between  
449 unstable housing and impairments in social and interpersonal functioning (Chambers et al.,  
450 2015; ViforJ et al., 2022).

## 451 **Discussion**

### 452 **Main findings**

453 This systematic review aimed to examine the association between housing insecurity  
454 and mental health among renters, with a specific focus on exposure to unaffordability and

455 instability as key dimensions of housing. Through a comprehensive search process, a total  
456 of 22 studies that met the inclusion criteria were included.

457 *Housing Affordability*

458         Among the nine studies examining housing affordability, six reported significant  
459 associations between unaffordable rent, more specifically rent burden and reduction in  
460 housing benefits, and low mental health. The majority of these studies (seven out of nine)  
461 focused solely on the low-income renter population. Thus, we can conclude from this review  
462 an association between unaffordable rent and poor mental health for this population.  
463 Notably, the studies with significant findings all took income into account, mitigating the risk  
464 of conflating the effect of (low) income and unaffordable rent on mental health (Baker,  
465 Lester, et al., 2020). In addition, previous publications also suggest that the burden of  
466 unaffordable housing mainly affects low-income renter and homeowner households,  
467 whereas high-income households do not experience such effects (Bentley et al., 2011;  
468 Morris et al., 2017). Renters with economic capital are likely to face fewer challenges related  
469 to housing insecurity, as they possess various means to compensate for these issues  
470 (Morris et al., 2017; Routhier, 2019). Moreover, the synthesis indicates that the association  
471 between unaffordable housing and mental health might differ depending on the context, in  
472 particular being less pronounced in countries with strong tenure protections. This pattern  
473 was observed in studies comparing different countries (Bentley et al., 2016) or exploring the  
474 consequences of deterioration of rental policies (Arundel et al., 2022; Reeves et al., 2016).  
475 These findings are consistent with other research investigating housing across different  
476 countries, although they are not restricted to the population of renters (Acolin, 2022; Herbers  
477 & Mulder, 2017; Hulse et al., 2011).

478         However, in the current review, the two included studies that examined housing  
479 affordability interventions (social housing and housing assistance) did not reveal differences  
480 in mental health outcomes compared to either no intervention (Chambers et al., 2015) or  
481 longitudinally after 6-12 months (Prentice & Scutella, 2020). Recent systematic reviews



482 encompassing households across different tenure statuses have also reported inconsistent  
483 evidence regarding the association of interventions promoting affordability and stability with  
484 improved mental health outcomes (Chen et al., 2022; Dweik & Woodhall-Melnik, 2022).  
485 Therefore, it remains unclear which specific interventions effectively enhance mental health  
486 among renters, highlighting the need for further studies in this area.

#### 487 *Housing Instability*

488 Among the 14 studies examining housing instability, 12 reported significant  
489 associations between unstable housing and poor mental health among renters. The  
490 significant associations were established through a diverse range of measures of housing  
491 instability, most commonly the risk of eviction, forced mobility, and frequency of transitions.  
492 Several studies also demonstrated positive effects of stable rental tenure and state eviction  
493 moratoriums in mitigating these adverse impacts. The absence of a standard definition for  
494 housing instability is evident from the diverse measures employed in the selected studies.  
495 However, the fact that many of these measures demonstrated a significant association with  
496 renters' well-being emphasizes the importance of including a range of exposure measures in  
497 a unified definition of housing instability (Cox et al., 2019; Routhier, 2019). This will enable  
498 future studies to delve more deeply into the multiple pathways through which housing  
499 instability appears to affect renters' well-being.

#### 500 **Strength of evidence**

501 The findings of this review contribute to the growing body of research on the social  
502 determinants of mental health (Baumgartner et al., 2023; Compton & Shim, 2015; Lund et  
503 al., 2018; Marmot & Wilkinson, 2005; Shaw, 2004; Suglia et al., 2015; Swope & Hernández,  
504 2019; WHO & Calouste Gulbenkian Foundation, 2014). The review provides strong evidence  
505 to support an association between housing insecurity and impaired mental health, with a  
506 substantial number of studies addressing each dimension, i.e. housing affordability and  
507 instability. In the case of housing affordability, the available data primarily concerned  
508 samples of low-income households, limiting the scope of conclusions to this specific



509 population group. A significant proportion of the studies employed robust study designs,  
510 such as longitudinal approaches ( $n = 15$ ). For both housing dimensions, the majority of  
511 studies demonstrated significant associations between measures of housing insecurity and  
512 overall mental health and depressive symptoms.

513 In contrast, the evidence for other mental health outcomes such as anxiety, mental  
514 health behavior, mental health treatment, suicidal ideation or behavior and psychosocial  
515 functioning was more limited and inconsistent. Due to the paucity of studies, further research  
516 is necessary to draw definitive conclusions about the associations of these outcomes with  
517 housing insecurity. Moreover, most of the outcome measurement tools used in the included  
518 studies were screening tools and relied on self-report data, and thus did not provide a clinical  
519 diagnosis or a comprehensive assessment of mental disorders, although most have shown  
520 good reliability and validity, making them useful for monitoring general mental health  
521 (Mawani & Gilmour, 2010). However, two studies relied solely on single-item questions (Ali &  
522 Wehby, 2022; Reeves et al., 2016), while another two studies did not provide sufficient detail  
523 for an assessment of psychometric properties (Park & Seo, 2020; Sandel et al., 2018).

524 Despite a noticeable shift in recent years, the number of publications specifically  
525 addressing housing insecurity among renters remains limited. Furthermore, the sample sizes  
526 were often small due to secondary analyses, leading to low statistical power and hindering  
527 stratified analysis. Moreover, the included studies that yielded non-significant findings might  
528 also have been underpowered, and an effect may potentially have become detectable with  
529 sufficient testing strength (see for example, Rodgers et al., 2019).

530 Although most findings show associations between unaffordable and unstable  
531 housing and mental health in different populations and contexts, based on the current  
532 evidence, and due to the methodology of the studies, it is not possible to draw causal  
533 conclusions. In particular, it is important to highlight that housing insecurity is intertwined with  
534 various other variables that might contribute to mental health problems, including  
535 socioeconomic factors, stress and negative life events, neighborhood disadvantages, and

536 other social inequality aspects. In addition, the relationship between housing insecurity and  
537 mental health is likely to be bidirectional. Previous research across different tenure statuses  
538 suggests that pre-existing mental health conditions increase the risk of housing insecurity  
539 outcomes, while housing insecurity also negatively affects mental health (Baker et al., 2013;  
540 Marçal, 2021; J. Tsai & Huang, 2019).

#### 541 **Future research directions**

542 Housing insecurity often manifests across multiple dimensions simultaneously, such  
543 as affordability, (in-)stability, and quality, and intersects with further social and economic  
544 disadvantages such as gender, disability, and race (Bentley et al., 2019; Carrere et al., 2022;  
545 DeLuca & Rosen, 2022; Hulse & Saugeres, 2008; Kirkpatrick & Tarasuk, 2011; Morris et al.,  
546 2017). On a micro-level, these factors can accumulate and reinforce each other, amplifying  
547 their adverse effects on mental health. Studies further indicate that housing insecurity and its  
548 impact on mental health also varies on a macro-level, across different social, legal, and  
549 cultural contexts (Acolin, 2022; Bentley et al., 2016; Herbers & Mulder, 2017; Hulse &  
550 Milligan, 2014; Hulse et al., 2011). Most of the included studies (19 out of 22) in this review  
551 were conducted in the UK, the U.S., and Australia, underlining the need for research from a  
552 broader range of countries. This is particularly relevant as housing insecurity is becoming  
553 increasingly prevalent, affecting the mental health of renters even in countries with  
554 previously good tenure security such as the Netherlands (Arundel et al., 2022). Given the  
555 heterogeneity within the group of renters and the likelihood of diverse experiences of  
556 housing insecurity and its impact on mental health based on economic and social  
557 circumstances, it is therefore crucial that future research adopts an intersectional lens and a  
558 bidirectional approach. Future research may additionally incorporate clinical interviews as  
559 well as measures that specifically capture other mental health problems potentially linked to  
560 housing insecurity, such as anxiety, suicide, and substance abuse (Lund et al., 2018).

#### 561 **Practical implications**

562 From a clinical perspective, the findings highlight the importance of considering social  
563 factors in understanding and effectively treating mental health issues. Health professionals  
564 could integrate screening questions for housing insecurity into the assessment, and remain  
565 aware of its potential impact throughout treatment, given its potential role as a triggering,  
566 maintaining, or reinforcing factor. More generally, adopting community psychological  
567 approaches that integrate mental healthcare with social work and legal support might be  
568 beneficial. The use of a multidisciplinary approach could include helping tenants who are  
569 experiencing housing insecurity to find affordable housing, access housing assistance, or  
570 navigate or resolve legal issues. Similar approaches have been successfully employed in  
571 homelessness prevention programs that align with the aim of achieving “zero discharge into  
572 homelessness” (Gaetz & Dej, 2017, p. 60; Moritsugu et al., 2019). As part of a  
573 multidisciplinary approach, health professionals would have a unique opportunity to shape  
574 public discourse, drive research efforts, and inform policy discussions to advocate for  
575 transformative change in the conditions contributing to social disadvantages (Compton &  
576 Shim, 2015). The findings of our review point to the potential benefit of providing affordable  
577 and stable housing options for renters, particularly for low-income households, as a strategy  
578 to improve public mental health. The question of which precise housing policy measures are  
579 effective, particularly for the most vulnerable groups of renters such as low-income, disabled,  
580 or racially marginalized households, remains an area for further research and investigation  
581 (DeLuca & Rosen, 2022).

## 582 **Limitations**

583 It is important to acknowledge some limitations of this systematic review. First, only a  
584 random 10 % of the studies underwent double screening, and similarly, data extraction was  
585 independently verified for only 30 % of the included studies. This may introduce bias and  
586 increase the risk of missed studies. Second, this review focused solely on two dimensions of  
587 housing insecurity, i.e. affordability and instability, even though housing insecurity is a  
588 multidimensional concept that includes further challenges such as housing conditions,

589 safety, and neighborhood opportunities. Third, we did not specifically explore the  
590 mechanisms linking housing insecurity and mental health, which could include factors such  
591 as stress, neighborhood conditions, disrupted routines, social integration, social support,  
592 stigma, financial stress, and access to healthcare (Compton & Shim, 2015; Kirst et al., 2020;  
593 Lund et al., 2018; Suglia et al., 2015; Swope & Hernández, 2019). Fourth, there was  
594 considerable heterogeneity between the designs of the individual studies, making it difficult  
595 to directly compare the results and to conduct a meta-analysis. Lastly, the eligibility criteria  
596 for this review were restricted to OECD countries, limiting the generalizability of the findings.  
597 However, some literature from non-OECD countries also points in a similar direction (Acolin,  
598 2022; Clair et al., 2016; Luginaah et al., 2010).

## 599 **Conclusion**

600 This systematic review is the first to specifically investigate the association between  
601 housing insecurity and mental health among renters, addressing a crucial gap in the  
602 literature. The findings indicate an association of renters' exposure to housing unaffordability  
603 and instability with adverse mental health outcomes, including overall mental health and  
604 depressive symptoms. Based on the current findings, health professionals might consider  
605 housing insecurity as a contributing and aggravating factor regarding mental health issues.  
606 Housing insecurity poses a global challenge for renters in OECD countries, highlighting the  
607 need for policymakers to implement supportive housing policies and tenure protection  
608 measures in order to improve renters' housing security and ultimately public health.

609

## 610 **Acknowledgements**

611 We would like to thank Sarah Mannion for the language editing of the manuscript.

612

## 613 **References**

- 614 Acharya, B., Bhatta, D., & Dhakal, C. (2022). The risk of eviction and the mental health outcomes  
615 among the US adults. *Preventive Medicine Reports*, 29, 101981.  
616 <https://doi.org/10.1016/j.pmedr.2022.101981>
- 617 Acolin, A. (2022). Owning vs. Renting: the benefits of residential stability? *Housing Studies*, 37(4),  
618 644–667. <https://doi.org/10.1080/02673037.2020.1823332>
- 619 Ali, A. K., & Wehby, G. L. (2022). State Eviction Moratoriums During The COVID-19 Pandemic Were  
620 Associated With Improved Mental Health Among People Who Rent. *Health Affairs (Project  
621 Hope)*, 41(11), 1583–1589. <https://doi.org/10.1377/hlthaff.2022.00750>
- 622 Arundel, R., Li, A., Baker, E., & Bentley, R. (2022). Housing unaffordability and mental health:  
623 dynamics across age and tenure. *International Journal of Housing Policy*, 1–31.  
624 <https://doi.org/10.1080/19491247.2022.2106541>
- 625 Baker, E., Bentley, R., Beer, A., & Daniel, L. (2020). *Renting in the time of COVID-19: understanding  
626 the impacts* (AHURI final report No. 340). Melbourne. Australian Housing and Urban  
627 Research Institute Limited. <https://doi.org/10.18408/ahuri3125401>
- 628 Baker, E., Bentley, R., & Mason, K. (2013). The Mental Health Effects of Housing Tenure: Causal or  
629 Compositional? *Urban Studies*, 50(2), 426–442. <https://doi.org/10.1177/0042098012446992>
- 630 Baker, E., Lester, L., Beer, A., & Bentley, R. (2019). An Australian geography of unhealthy housing.  
631 *Geographical Research*, 57(1), 40–51. <https://doi.org/10.1111/1745-5871.12326>
- 632 Baker, E., Lester, L., Mason, K., & Bentley, R. (2020). Mental health and prolonged exposure to  
633 unaffordable housing: A longitudinal analysis. *Social Psychiatry and Psychiatric  
634 Epidemiology*, 55(6), 715–721. <https://doi.org/10.1007/s00127-020-01849-1>
- 635 Baumgartner, J., Rodriguez, J., Berkhout, F., Doyle, Y., Ezzati, M., Owuso, G., Quayyum, Z.,  
636 Solomon, B., Winters, M., Adamkiewicz, G., & Robinson, B. E. (2023). Synthesizing the links  
637 between secure housing tenure and health for more equitable cities [version 2; peer review: 1  
638 approved, 1 approved with reservations]. *Wellcome Open Research*, 7, 18.  
639 <https://doi.org/10.12688/wellcomeopenres.17244.2>
- 640 Bentley, R., Baker, E., & Aitken, Z. (2019). The 'double precarity' of employment insecurity and  
641 unaffordable housing and its impact on mental health. *Social Science & Medicine*, 225, 9–16.  
642 <https://doi.org/10.1016/j.socscimed.2019.02.008>
- 643 Bentley, R., Baker, E., Mason, K., Subramanian, S. V., & Kavanagh, A. M. (2011). Association  
644 between housing affordability and mental health: A longitudinal analysis of a nationally  
645 representative household survey in Australia. *American Journal of Epidemiology*, 174(7),  
646 753–760. <https://doi.org/10.1093/aje/kwr161>
- 647 Bentley, R., Pevalin, D., Baker, E., Mason, K., Reeves, A., & Beer, A. (2016). Housing affordability,  
648 tenure and mental health in Australia and the United Kingdom: a comparative panel analysis.  
649 *Housing Studies*, 31(2), 208–222. <https://doi.org/10.1080/02673037.2015.1070796>
- 650 Bone, J. (2014). Neoliberal Nomads: Housing Insecurity and the Revival of Private Renting in the UK.  
651 *Sociological Research Online*, 19(4), 1–14. <https://doi.org/10.5153/sro.3491>
- 652 Burgard, S. A., Seefeldt, K. S., & Zelner, S. (2012). Housing instability and health: Findings from the  
653 Michigan Recession and Recovery Study. *Social Science & Medicine*, 75(12), 2215–2224.  
654 <https://doi.org/10.1016/j.socscimed.2012.08.020>
- 655 Carrere, J., Vásquez-Vera, H., Pérez-Luna, A., Novoa, A. M., & Borrell, C. (2022). Housing Insecurity  
656 and Mental Health: The Effect of Housing Tenure and the Coexistence of Life Insecurities.  
657 *Journal of Urban Health : Bulletin of the New York Academy of Medicine*, 99(2), 268–276.  
658 <https://doi.org/10.1007/s11524-022-00619-5>
- 659 Chambers, E. C., Fuster, D., Suglia, S. F., & Rosenbaum, E. (2015). Depressive Symptomology and  
660 Hostile Affect among Latinos Using Housing Rental Assistance: The AHOME Study. *Journal  
661 of Urban Health : Bulletin of the New York Academy of Medicine*, 92(4), 611–621.  
662 <https://doi.org/10.1007/s11524-015-9965-0>
- 663 Chen, K. L., Miake-Lye, I. M., Begashaw, M. M., Zimmerman, F. J., Larkin, J., McGrath, E. L., &  
664 Shekelle, P. G. (2022). Association of Promoting Housing Affordability and Stability With  
665 Improved Health Outcomes: A Systematic Review. *JAMA Network Open*, 5(11), e2239860.  
666 <https://doi.org/10.1001/jamanetworkopen.2022.39860>
- 667 Clair, A., Loopstra, R., Reeves, A., McKee, M., Dorling, D., & Stuckler, D. (2016). The impact of  
668 housing payment problems on health status during economic recession: A comparative

- 669 analysis of longitudinal EU SILC data of 27 European states, 2008-2010. *SSM - Population*  
670 *Health*, 2, 306–316. <https://doi.org/10.1016/j.ssmph.2016.05.006>
- 671 Clair, A., Reeves, A., McKee, M., & Stuckler, D. (2019). Constructing a housing precariousness  
672 measure for Europe. *Journal of European Social Policy*, 29(1), 13–28.  
673 <https://doi.org/10.1177/0958928718768334>
- 674 Cohen, J. (1960). A Coefficient of Agreement for Nominal Scales. *Educational and Psychological*  
675 *Measurement*, 20(1), 37–46. <https://doi.org/10.1177/001316446002000104>
- 676 Compton, M. T., & Shim, R. S. (2015). The Social Determinants of Mental Health. *FOCUS*, 13(4),  
677 419–425. <https://doi.org/10.1176/appi.focus.20150017>
- 678 Cox, R., Henwood, B., Rodnyansky, S., Rice, E., & Wenzel, S. (2019). Road Map to a Unified  
679 Measure of Housing Insecurity. *Cityscape*, 21(2), 93–128.  
680 <https://www.jstor.org/stable/26696378>
- 681 Crook, T., & Kemp, P. (2014). Introduction. In T. Crook & P. Kemp (Eds.), *Elgaronline. Private Rental*  
682 *Housing: Comparative Perspectives* (pp. 1–26). Edward Elgar.
- 683 DeLuca, S., & Rosen, E. (2022). Housing Insecurity Among the Poor Today. *Annual Review of*  
684 *Sociology*, 48(1), 343–371. <https://doi.org/10.1146/annurev-soc-090921-040646>
- 685 Des Jarlais, D. C., Lyles, C., & Crepaz, N. (2004). Improving the reporting quality of nonrandomized  
686 evaluations of behavioral and public health interventions: The TREND statement. *American*  
687 *Journal of Public Health*, 94(3), 361–366. <https://doi.org/10.2105/ajph.94.3.361>
- 688 Desmond, M., & Kimbro, R. T. (2015). Eviction's Fallout: Housing, Hardship, and Health. *Social*  
689 *Forces*, 94(1), 295–324. <https://doi.org/10.1093/sf/sov044>
- 690 Downing, J. (2016). The health effects of the foreclosure crisis and unaffordable housing: A  
691 systematic review and explanation of evidence. *Social Science & Medicine*, 162, 88–96.  
692 <https://doi.org/10.1016/j.socscimed.2016.06.014>
- 693 Dupuis, A., & Thorns, D. C. (1998). Home, Home Ownership and the Search for Ontological Security.  
694 *The Sociological Review*, 46(1), 24–47. <https://doi.org/10.1111/1467-954X.00088>
- 695 Dweik, I., & Woodhall-Melnik, J. (2022). A systematic review of the relationship between publicly  
696 subsidised housing, depression, and anxiety among low-income households. *International*  
697 *Journal of Housing Policy*, 1–31. <https://doi.org/10.1080/19491247.2022.2037175>
- 698 Easthope, H. (2014). Making a Rental Property Home. *Housing Studies*, 29(5), 579–596.  
699 <https://doi.org/10.1080/02673037.2013.873115>
- 700 Elliott, S., West, S. M., & Castro, A. B. (2021). Rent Burden and Depression Among Mothers: An  
701 Analysis of Primary Caregiver Outcomes. *Journal of Policy Practice and Research*, 2(4), 285–  
702 300. <https://doi.org/10.1007/s42972-021-00040-3>
- 703 Elm, E. von, Altman, D. G., Egger, M., Pocock, S. J., Gøtzsche, P. C., & Vandenbroucke, J. P. (2008).  
704 The Strengthening the Reporting of Observational Studies in Epidemiology (STROBE)  
705 statement: Guidelines for reporting observational studies. *Journal of Clinical Epidemiology*,  
706 61(4), 344–349. <https://doi.org/10.1016/j.jclinepi.2007.11.008>
- 707 Eurostat. (2022). *Housing in Europe: 2022 interactive edition* [Publications Office of the European  
708 Union].
- 709 Fazel, S., Khosla, V., Doll, H., & Geddes, J. (2008). The prevalence of mental disorders among the  
710 homeless in western countries: Systematic review and meta-regression analysis. *PLoS*  
711 *Medicine*, 5(12), e225. <https://doi.org/10.1371/journal.pmed.0050225>
- 712 Franzoi, I. G., Carnevale, G., Sauta, M. D., & Granieri, A. (2022). Housing conditions and  
713 psychological distress among higher education students: a systematic literature review.  
714 *Journal of Further and Higher Education*, 47(2), 229–241.  
715 <https://doi.org/10.1080/0309877X.2022.2102416>
- 716 Gaetz, S., & Dej, E. (2017). *A new direction: A framework for homelessness prevention*. Toronto.  
717 Canadian Observatory on Homelessness Press.  
718 <https://www.eenetconnect.ca/filesendaction/fctype/0/fcoid/360050555503230772/filepointer/360050555503230803/fodoid/360050555503230797/cohpreventionframework.pdf>
- 719 Herbers, D. J., & Mulder, C. H. (2017). Housing and subjective well-being of older adults in Europe.  
720 *Journal of Housing and the Built Environment*, 32(3), 533–558.  
721 <https://doi.org/10.1007/s10901-016-9526-1>
- 722



- 723 Hiscock, R., Kearns, A., Macintyre, S., & Ellaway, A. (2001). Ontological Security and Psycho-Social  
724 Benefits from the Home: Qualitative Evidence on Issues of Tenure. *Housing, Theory and*  
725 *Society*, 18(1-2), 50–66. <https://doi.org/10.1080/14036090120617>
- 726 Hodgson, K. J., Shelton, K. H., van den Bree, M. B. M., & Los, F. J. (2013). Psychopathology in young  
727 people experiencing homelessness: A systematic review. *American Journal of Public Health*,  
728 103(6), e24-37. <https://doi.org/10.2105/AJPH.2013.301318>
- 729 Hulse, K., & Milligan, V. (2014). Secure Occupancy: A New Framework for Analysing Security in  
730 Rental Housing. *Housing Studies*, 29(5), 638–656.  
731 <https://doi.org/10.1080/02673037.2013.873116>
- 732 Hulse, K., Milligan, V., & Easthope, H. (2011). *Secure occupancy in rental housing: conceptual*  
733 *foundations and comparative perspectives* (AHURI final report No. 170). Melbourne.  
734 Australian Housing and Urban Research Institute Limited.  
735 <https://www.ahuri.edu.au/research/final-reports/170>
- 736 Hulse, K., Morris, A., & Pawson, H. (2019). Private Renting in a Home-owning Society: Disaster,  
737 Diversity or Deviance? *Housing, Theory and Society*, 36(2), 167–188.  
738 <https://doi.org/10.1080/14036096.2018.1467964>
- 739 Hulse, K., & Saugeres, L. (2008). *Housing insecurity and precarious living: An Australian exploration*  
740 (AHURI final report No. 124). Melbourne. Australian Housing and Urban Research Institute  
741 Limited. <https://www.ahuri.edu.au/research/final-reports/124>
- 742 Hulse, K., & Yates, J. (2017). A private rental sector paradox: Unpacking the effects of urban  
743 restructuring on housing market dynamics. *Housing Studies*, 32(3), 253–270.  
744 <https://doi.org/10.1080/02673037.2016.1194378>
- 745 James, L., Daniel, L., Bentley, R., & Baker, E. (2022). Housing inequality: a systematic scoping  
746 review. *Housing Studies*, 1–22. <https://doi.org/10.1080/02673037.2022.2119211>
- 747 Jelleyman, T., & Spencer, N. (2008). Residential mobility in childhood and health outcomes: A  
748 systematic review. *Journal of Epidemiology & Community Health*, 62(7), 584–592.  
749 <https://doi.org/10.1136/jech.2007.060103>
- 750 Kearns, A., Hiscock, R., Ellaway, A., & Macintyre, S. (2000). 'beyond Four Walls'. The Psycho-social  
751 Benefits of Home: Evidence from West Central Scotland. *Housing Studies*, 15(3), 387–410.  
752 <https://doi.org/10.1080/02673030050009249>
- 753 Kim, H., & Burgard, S. A. (2022). Housing instability and mental health among renters in the michigan  
754 recession and recovery study. *Public Health*, 209, 30–35.  
755 <https://doi.org/10.1016/j.puhe.2022.05.015>
- 756 Kirkpatrick, S. I., & Tarasuk, V. (2011). Housing Circumstances are Associated with Household Food  
757 Access among Low-Income Urban Families. *Journal of Urban Health : Bulletin of the New*  
758 *York Academy of Medicine*, 88(2), 284–296. <https://doi.org/10.1007/s11524-010-9535-4>
- 759 Kirst, M., Friesdorf, R., Ta, M., Amiri, A., Hwang, S. W., Stergiopoulos, V., & O'Campo, P. (2020).  
760 Patterns and effects of social integration on housing stability, mental health and substance  
761 use outcomes among participants in a randomized controlled Housing First trial. *Social*  
762 *Science & Medicine*, 265, 113481. <https://doi.org/10.1016/j.socscimed.2020.113481>
- 763 Kroenke, K., Spitzer, R. L., & Williams, J. B. W. (2003). The Patient Health Questionnaire-2: Validity of  
764 a two-item depression screener. *Medical Care*, 41(11), 1284–1292.  
765 <https://doi.org/10.1097/01.MLR.0000093487.78664.3C>
- 766 Kyle, T., & Dunn, J. R. (2008). Effects of housing circumstances on health, quality of life and  
767 healthcare use for people with severe mental illness: A review. *Health & Social Care in the*  
768 *Community*, 16(1), 1–15. <https://doi.org/10.1111/j.1365-2524.2007.00723.x>
- 769 Landis, J. R., & Koch, G. G. (1977). The Measurement of Observer Agreement for Categorical Data.  
770 *Biometrics*, 33(1), 159. <https://doi.org/10.2307/2529310>
- 771 Leifheit, K. M., Pollack, C. E., Raifman, J., Schwartz, G. L., Koehler, R. D., Rodriguez Bronico, J. V.,  
772 Benfer, E. A., Zimmerman, F. J., & Linton, S. L. (2021). Variation in State-Level Eviction  
773 Moratorium Protections and Mental Health Among US Adults During the COVID-19  
774 Pandemic. *JAMA Network Open*, 4(12), e2139585.  
775 <https://doi.org/10.1001/jamanetworkopen.2021.39585>
- 776 Li, A., Baker, E., & Bentley, R. (2022). Understanding the mental health effects of instability in the  
777 private rental sector: A longitudinal analysis of a national cohort. *Social Science & Medicine*,  
778 296, 114778. <https://doi.org/10.1016/j.socscimed.2022.114778>

- 779 Li, Y., Bentley, R., Singh, A., & Alfonzo, L. F. (2021). OP15 Housing disadvantage in childhood and  
780 health: A systematic review. *Journal of Epidemiology and Community Health, 50*(75), A7.  
781 <https://doi.org/10.1136/jech-2021-SSMabstracts.15>
- 782 Luginaah, I., Arku, G., & Baiden, P. (2010). Housing and health in Ghana: The psychosocial impacts  
783 of renting a home. *International Journal of Environmental Research and Public Health, 7*(2),  
784 528–545. <https://doi.org/10.3390/ijerph7020528>
- 785 Lund, C., Brooke-Sumner, C., Baingana, F., Baron, E. C., Breuer, E., Chandra, P., Haushofer, J.,  
786 Herrman, H., Jordans, M., Kieling, C., Medina-Mora, M. E., Morgan, E., Omigbodun, O.,  
787 Tol, W., Patel, V., & Saxena, S. (2018). Social determinants of mental disorders and the  
788 Sustainable Development Goals: A systematic review of reviews. *The Lancet. Psychiatry,*  
789 *5*(4), 357–369. [https://doi.org/10.1016/S2215-0366\(18\)30060-9](https://doi.org/10.1016/S2215-0366(18)30060-9)
- 790 Marçal, K. E. (2021). Perceived Instrumental Support as a Mediator between Maternal Mental Health  
791 and Housing Insecurity. *Journal of Child and Family Studies, 30*(12), 3070–3079.  
792 <https://doi.org/10.1007/s10826-021-02132-w>
- 793 Marmot, M., & Wilkinson, R. (2005). *Social Determinants of Health* (2nd ed.). Oxford University Press  
794 USA - OSO.
- 795 Mason, K. E., Baker, E., Blakely, T., & Bentley, R. J. (2013). Housing affordability and mental health:  
796 Does the relationship differ for renters and home purchasers? *Social Science & Medicine, 94,*  
797 91–97. <https://doi.org/10.1016/j.socscimed.2013.06.023>
- 798 Mawani, F. N., & Gilmour, H. (2010). Validation of self-rated mental health. *Health Reports, 21*(3), 61–  
799 75.
- 800 Moritsugu, J., Vera, E. M., Wong, F. Y., & Duffy, K. G. (2019). *Community psychology* (6th edition).  
801 Routledge. [https://www.taylorfrancis.com/books/mono/10.4324/9780429021558/community-](https://www.taylorfrancis.com/books/mono/10.4324/9780429021558/community-psychology-john-moritsugu-elizabeth-vera-frank-wong-karen-duffy)  
802 <https://doi.org/10.4324/9780429021558>  
803 <https://doi.org/10.4324/9780429021558>
- 804 Morris, A., Hulse, K., & Pawson, H. (2017). Long-term private renters: Perceptions of security and  
805 insecurity. *Journal of Sociology, 53*(3), 653–669. <https://doi.org/10.1177/1440783317707833>
- 806 Nepal, B., Tanton, R., & Harding, A. (2010). Measuring Housing Stress: How Much do Definitions  
807 Matter? *Urban Policy and Research, 28*(2), 211–224.  
808 <https://doi.org/10.1080/08111141003797454>
- 809 Organisation for Economic Co-operation and Development. (2023, July 25). *About the OECD.*  
810 <https://www.oecd.org/about/>
- 811 Oswald, D., Moore, T., & Baker, E. (2022). Exploring the well-being of renters during the COVID-19  
812 pandemic. *International Journal of Housing Policy, 23*(2), 1–21.  
813 <https://doi.org/10.1080/19491247.2022.2037177>
- 814 Padgett, D. K. (2007). There's no place like (a) home: Ontological security among persons with  
815 serious mental illness in the United States. *Social Science & Medicine, 64*(9), 1925–1936.  
816 <https://doi.org/10.1016/j.socscimed.2007.02.011>
- 817 Page, M. J., McKenzie, J. E., Bossuyt, P. M., Boutron, I., Hoffmann, T. C., Mulrow, C. D.,  
818 Shamseer, L., Tetzlaff, J. M., Akl, E. A., Brennan, S. E., Chou, R., Glanville, J.,  
819 Grimshaw, J. M., Hróbjartsson, A., Lalu, M. M., Li, T., Loder, E. W., Mayo-Wilson, E.,  
820 McDonald, S., . . . Moher, D. (2021). The PRISMA 2020 statement: An updated guideline for  
821 reporting systematic reviews. *BMJ (Clinical Research Ed.), 372*, n71.  
822 <https://doi.org/10.1136/bmj.n71>
- 823 Park, K., & Seo, W. (2020). Effects of Residential Instability of Renters on Their Perceived Health  
824 Status: Findings from the Korean Welfare Panel Study. *International Journal of Environmental*  
825 *Research and Public Health, 17*(19), 7125. <https://doi.org/10.3390/ijerph17197125>
- 826 Pevalin, D. J. (2009). Housing repossessions, evictions and common mental illness in the UK: Results  
827 from a household panel study. *Journal of Epidemiology & Community Health, 63*(11), 949–  
828 951. <https://doi.org/10.1136/jech.2008.083477>
- 829 Prentice, D., & Scutella, R. (2020). What are the impacts of living in social housing? New evidence  
830 from Australia. *Housing Studies, 35*(4), 612–647. [https://www.proquest.com/scholarly-](https://www.proquest.com/scholarly-journals/what-are-impacts-living-social-housing-new/docview/2384773537/se-2?accountid=11004)  
831 [journals/what-are-impacts-living-social-housing-new/docview/2384773537/se-](https://www.proquest.com/scholarly-journals/what-are-impacts-living-social-housing-new/docview/2384773537/se-2?accountid=11004)  
832 [2?accountid=11004](https://www.proquest.com/scholarly-journals/what-are-impacts-living-social-housing-new/docview/2384773537/se-2?accountid=11004)
- 833 Prindex (Ed.). (2020). *A global assessment of perceived tenure security from 140 countries:*  
834 *Comparative Report.*



- 835 Purssell, E., & McCrae, N. (2020). *How to perform a systematic literature review: A guide for*  
836 *healthcare researchers, practitioners and students*. Springer.
- 837 Rautio, N., Filatova, S., Lehtiniemi, H., & Miettunen, J. (2018). Living environment and its relationship  
838 to depressive mood: A systematic review. *The International Journal of Social Psychiatry*,  
839 *64*(1), 92–103. <https://doi.org/10.1177/0020764017744582>
- 840 Reeves, A., Clair, A., McKee, M., & Stuckler, D. (2016). Reductions in the United Kingdom's  
841 Government Housing Benefit and Symptoms of Depression in Low-Income Households.  
842 *American Journal of Epidemiology*, *184*(6), 421–429. <https://doi.org/10.1093/aje/kww055>
- 843 Richardson, R., Westley, T., Gariépy, G., Austin, N., & Nandi, A. (2015). Neighborhood  
844 socioeconomic conditions and depression: A systematic review and meta-analysis. *Social*  
845 *Psychiatry and Psychiatric Epidemiology*, *50*(11), 1641–1656. [https://doi.org/10.1007/s00127-](https://doi.org/10.1007/s00127-015-1092-4)  
846 *015-1092-4*
- 847 Rodgers, J., Briesacher, B. A., Wallace, R. B., Kawachi, I., Baum, C. F., & Kim, D. (2019). County-  
848 level housing affordability in relation to risk factors for cardiovascular disease among middle-  
849 aged adults: The National Longitudinal Survey of Youths 1979. *Health & Place*, *59*, 102194.  
850 <https://doi.org/10.1016/j.healthplace.2019.102194>
- 851 Routhier, G. (2019). Beyond Worst Case Needs: Measuring the Breadth and Severity of Housing  
852 Insecurity Among Urban Renters. *Housing Policy Debate*, *29*(2), 235–249.  
853 <https://doi.org/10.1080/10511482.2018.1509228>
- 854 Sandel, M., Sheward, R., Ettinger de Cuba, S., Coleman, S. M., Frank, D. A., Chilton, M., Black, M.,  
855 Heeren, T., Pasquariello, J., Casey, P., Ochoa, E., & Cutts, D. (2018). Unstable Housing and  
856 Caregiver and Child Health in Renter Families. *Pediatrics*, *141*(2).  
857 <https://doi.org/10.1542/peds.2017-2199>
- 858 Shaw, M. (2004). Housing and Public Health. *Annu Rev Public Health*, *25*, 397–418.  
859 <https://doi.org/10.1146/annurev.publhealth.25.101802.123036>
- 860 Singh, A., Daniel, L., Baker, E., & Bentley, R. (2019). Housing Disadvantage and Poor Mental Health:  
861 A Systematic Review. *American Journal of Preventive Medicine*, *57*(2), 262–272.  
862 <https://doi.org/10.1016/j.amepre.2019.03.018>
- 863 Suglia, S. F., Chambers, E. C., & Sandel, M. T. (2015). Poor Housing Quality and Housing Instability:  
864 Chapter 8. In M. T. Compton & R. S. Shim (Eds.), *The social determinants of mental health*  
865 (171-192). American Psychiatric Publishing, a division of American Psychiatric Association.
- 866 Swope, C. B., & Hernández, D. (2019). Housing as a determinant of health equity: A conceptual  
867 model. *Social Science & Medicine*, *243*, 112571.  
868 <https://doi.org/10.1016/j.socscimed.2019.112571>
- 869 Truong, K. D., & Ma, S. (2006). A systematic review of relations between neighborhoods and mental  
870 health. *The Journal of Mental Health Policy and Economics*, *9*(3), 137–154.
- 871 Tsai, A. C. (2015). Home foreclosure, health, and mental health: A systematic review of individual,  
872 aggregate, and contextual associations. *PloS One*, *10*(4), e0123182.  
873 <https://doi.org/10.1371/journal.pone.0123182>
- 874 Tsai, J., & Huang, M. (2019). Systematic review of psychosocial factors associated with evictions.  
875 *Health & Social Care in the Community*, *27*(3), e1-e9. <https://doi.org/10.1111/hsc.12619>
- 876 Tsai, J., Jones, N., Szymkowiak, D., & Rosenheck, R. A. (2021). Longitudinal study of the housing  
877 and mental health outcomes of tenants appearing in eviction court. *Social Psychiatry and*  
878 *Psychiatric Epidemiology*, *56*(9), 1679–1686. <https://doi.org/10.1007/s00127-020-01953-2>
- 879 United Nations (Ed.). (February 2020). *Affordable housing and social protection systems for all to*  
880 *address homelessness: Report of the Secretary-General* (E/CN.5/2020/3).  
881 <https://undocs.org/E/CN.5/2020/3>
- 882 Vásquez-Vera, C., Carrere, J., Borrell, C., & Vásquez-Vera, H. (2022). Neglected housing insecurity  
883 and its relationship with renters health: The case of Barcelona, Spain. *Gaceta Sanitaria*,  
884 *36*(3), 207–213. <https://doi.org/10.1016/j.gaceta.2021.08.005>
- 885 Vásquez-Vera, H., Palència, L., Magna, I., Mena, C., Neira, J., & Borrell, C. (2017). The threat of  
886 home eviction and its effects on health through the equity lens: A systematic review. *Social*  
887 *Science & Medicine*, *175*, 199–208. <https://doi.org/10.1016/j.socscimed.2017.01.010>
- 888 Vifor, R. O., Hewton, J., Bawa, S., & Singh, R. (2022). Forced housing mobility and mental  
889 wellbeing: evidence from Australia. *International Journal of Housing Policy*. Advance online  
890 publication. <https://doi.org/10.1080/19491247.2022.2059845>

- 891 Waldron, R. (2022). Experiencing housing precarity in the private rental sector during the covid-19  
892 pandemic: the case of Ireland. *Housing Studies*, 1–23.  
893 <https://doi.org/10.1080/02673037.2022.2032613>  
894 WHO, & Calouste Gulbenkian Foundation. (2014). *Social determinants of mental health*. Geneva.  
895 World Health Organization.  
896 [http://apps.who.int/iris/bitstream/handle/10665/112828/9789241506809\\_eng.pdf?sequence=1](http://apps.who.int/iris/bitstream/handle/10665/112828/9789241506809_eng.pdf?sequence=1)

897

898

### Supporting information

- 899 **S1 Appendix. Preferred Reporting Items for Systematic Reviews and Meta-Analyses**  
900 **(PRISMA) Checklist 2020.**
- 901 **S2 Appendix. Complete Search Syntax.**
- 902 **S3 Appendix. Screening Form (Full-Text) Including Reasons for Exclusion for Each**  
903 **Study Report.**
- 904 **S4 Appendix. Reporting Quality of the Included Studies.**
- 905 **S5 Appendix. Reference List of the Measurement Tools Used in the Included Studies.**

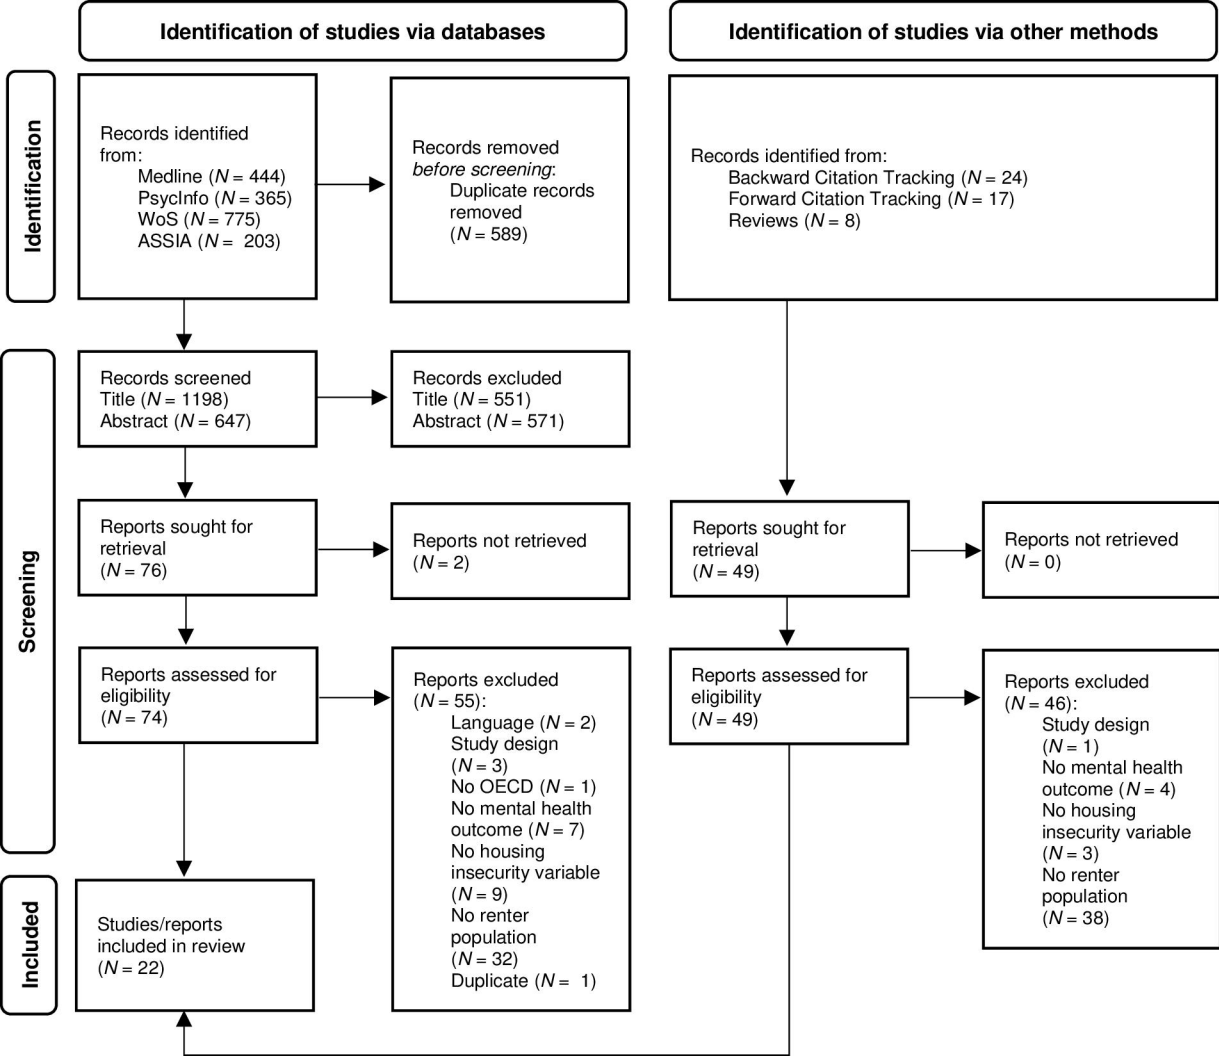

Source: https://medrxiv.org/content/10.1101/2023.11.01.23297773v1.full.pdf
